# Supplementary material for: Relationships Between Copper-Related Proteomes and Lifestyles in β Proteobacteria
Source: Front Microbiol. 2019 Sep 24;10:2217. doi: 10.3389/fmicb.2019.02217 (PMC6769254; doi:10.3389/fmicb.2019.02217)
Supplement: FILE S1 — HMM profile for the copper storage protein domain, CSP.hmm. [file Data_Sheet_1.ZIP]

Archive with 3 entries (2 files):
- Antoine CSP.hmm
- __MACOSX/
- __MACOSX/._Antoine CSP.hmm
