# Supplementary material for: Relationships Between Copper-Related Proteomes and Lifestyles in β Proteobacteria
Source: Front Microbiol. 2019 Sep 24;10:2217. doi: 10.3389/fmicb.2019.02217 (PMC6769254; doi:10.3389/fmicb.2019.02217)
Supplement: FILE S1 — HMM profile for the copper storage protein domain, CSP.hmm. [file Data_Sheet_1.ZIP › Antoine CSP.hmm]

HMMER3/f [3.2.1 | June 2018]
NAME  Copper Storage Protein domain
LENG  114
ALPH  amino
RF    no
MM    no
CONS  yes
CS    no
MAP   yes
DATE  Thu Nov 22 17:28:37 2018
NSEQ  30
EFFN  1.351318
CKSUM 1743118367
STATS LOCAL MSV      -11.2333  0.71459
STATS LOCAL VITERBI  -11.9835  0.71459
STATS LOCAL FORWARD   -4.0185  0.71459
HMM          A        C        D        E        F        G        H        I        K        L        M        N        P        Q        R        S        T        V        W        Y   
            m->m     m->i     m->d     i->m     i->i     d->m     d->d
  COMPO   2.26432  2.50325  3.02513  2.58392  3.78290  3.18650  3.56913  3.11680  2.65107  2.68319  3.52438  3.10813  3.68509  2.96427  2.98177  2.61446  2.86431  2.86409  5.19753  3.89050
          2.68241  4.42372  2.77598  2.73152  3.46432  2.40562  3.71812  3.29407  2.67875  2.69385  4.23754  2.90380  2.73883  3.18189  2.89785  2.37965  2.77526  2.98552  4.58624  3.61650
          0.96597  1.18445  1.16005  2.93851  0.05440  0.00000        *
      1   2.47302  4.89932  2.44887  2.34324  4.18187  2.97335  3.18043  3.62051  2.35081  3.18141  3.70302  2.87557  3.77206  2.71028  2.53156  2.53407  2.75112  3.25887  5.38303  4.02041     39 e - - -
          2.68618  4.42225  2.77519  2.73123  3.46354  2.40513  3.72494  3.29354  2.67741  2.69355  4.24690  2.90347  2.73739  3.18146  2.89801  2.37887  2.77519  2.98518  4.58477  3.61503
          0.02765  3.99788  4.72022  0.61958  0.77255  0.86366  0.54752
      2   2.35894  4.79279  2.85078  2.43042  4.08577  3.35811  2.49582  3.52770  2.43979  3.12583  3.95349  2.80452  2.72924  2.74128  2.86277  2.65773  2.87793  3.19367  5.34395  4.00888     40 a - - -
          2.68618  4.42225  2.77519  2.73123  3.46354  2.40513  3.72494  3.29354  2.67741  2.69355  4.24690  2.90347  2.73739  3.18146  2.89801  2.37887  2.77519  2.98518  4.58477  3.61503
          0.04625  3.99788  3.61787  0.61958  0.77255  0.77342  0.61884
      3   2.31719  4.45760  2.99609  2.66698  3.71536  2.74542  3.74555  3.05842  2.65055  2.76469  3.18864  3.11831  3.84555  2.97882  3.06144  2.66958  2.34347  2.52653  5.09623  3.82507     41 a - - -
          2.68618  4.42225  2.77519  2.73123  3.46354  2.40513  3.72494  3.29354  2.67741  2.69355  4.24690  2.90347  2.73739  3.18146  2.89801  2.37887  2.77519  2.98518  4.58477  3.61503
          0.02662  4.03536  4.75771  0.61958  0.77255  0.83618  0.56803
      4   1.79661  4.28113  3.46362  2.92994  3.36015  3.37168  3.89515  2.77154  2.88583  2.66837  3.56876  3.28832  3.87042  3.19600  3.24317  2.29125  2.50618  2.51177  5.05876  3.81965     42 a - - -
          2.68618  4.42225  2.77519  2.73123  3.46354  2.40513  3.72494  3.29354  2.67741  2.69355  4.24690  2.90347  2.73739  3.18146  2.89801  2.37887  2.77519  2.98518  4.58477  3.61503
          0.02662  4.03536  4.75771  0.61958  0.77255  0.45207  1.01145
      5   2.29571  4.57027  3.24523  2.68822  3.74947  3.53571  3.76018  3.12735  2.45950  2.54283  2.30072  2.84868  3.67423  2.76447  3.03670  2.76555  2.87257  2.86796  5.12036  3.84769     43 a - - -
          2.68618  4.42225  2.77519  2.73123  3.46354  2.40513  3.72494  3.29354  2.67741  2.69355  4.24690  2.90347  2.73739  3.18146  2.89801  2.37887  2.77519  2.98518  4.58477  3.61503
          0.02093  4.27288  4.99523  0.61958  0.77255  0.44074  1.03158
      6   2.56186  4.96442  2.84559  2.25669  4.23556  2.90751  3.65935  3.67241  2.43245  3.10276  3.24012  2.90890  3.01237  2.69250  2.81810  2.34047  2.69098  3.22752  5.44431  3.83078     44 e - - -
          2.68618  4.42225  2.77519  2.73123  3.46354  2.40513  3.72494  3.29354  2.67741  2.69355  4.24690  2.90347  2.73739  3.18146  2.89801  2.37887  2.77519  2.98518  4.58477  3.61503
          0.01931  4.35253  5.07488  0.61958  0.77255  0.50415  0.92639
      7   2.50413  5.08773  2.82940  2.34050  4.39825  3.13247  2.95548  3.86055  2.39283  3.28936  4.13960  2.28029  3.53064  2.59491  2.82657  2.56673  2.40910  3.46008  5.54239  4.15273     45 n - - -
          2.68628  4.42235  2.77525  2.73127  3.46364  2.40523  3.72504  3.29349  2.67738  2.69358  4.24700  2.90336  2.73722  3.18156  2.89803  2.37887  2.77477  2.98528  4.58487  3.61513
          0.79850  1.40919  1.18530  0.67621  0.71038  0.50415  0.92639
      8   2.39231  4.52899  2.62665  2.58546  3.43530  3.45004  3.68026  3.08974  2.58054  2.57898  3.62599  3.06427  3.84571  2.91102  3.00417  2.49079  2.80652  2.82573  5.03780  2.87992     48 a - - -
          2.68618  4.42225  2.77519  2.73123  3.46354  2.40513  3.72494  3.29354  2.67741  2.69355  4.24690  2.90347  2.73739  3.18146  2.89801  2.37887  2.77519  2.98518  4.58477  3.61503
          0.02768  3.99671  4.71906  0.61958  0.77255  0.30580  1.33382
      9   2.44453  5.12511  2.78757  2.10206  4.44913  3.44033  3.43588  3.70000  2.25728  3.42122  4.17204  2.85706  2.96468  2.38156  2.86755  2.31413  2.75337  3.50453  5.57023  4.17167     49 e - - -
          2.68618  4.42225  2.77519  2.73123  3.46354  2.40513  3.72494  3.29354  2.67741  2.69355  4.24690  2.90347  2.73739  3.18146  2.89801  2.37887  2.77519  2.98518  4.58477  3.61503
          0.01907  4.36503  5.08738  0.61958  0.77255  0.48576  0.95510
     10   2.38094  5.15408  2.57912  2.27280  4.48928  3.43920  3.43682  3.96725  2.09278  3.45394  4.19832  2.74244  3.83555  2.56287  2.38393  2.40570  2.73201  3.53961  5.59121  4.18764     50 k - - -
          2.68618  4.42225  2.77519  2.73123  3.46354  2.40513  3.72494  3.29354  2.67741  2.69355  4.24690  2.90347  2.73739  3.18146  2.89801  2.37887  2.77519  2.98518  4.58477  3.61503
          0.01907  4.36503  5.08738  0.61958  0.77255  0.48576  0.95510
     11   2.67549  4.08789  4.39706  3.79909  2.43009  3.59536  3.91008  2.30340  3.63324  1.71278  2.61275  3.89347  4.17856  3.80390  3.72348  3.11782  2.90713  2.25561  4.67071  2.67517     51 l - - -
          2.68618  4.42225  2.77519  2.73123  3.46354  2.40513  3.72494  3.29354  2.67741  2.69355  4.24690  2.90347  2.73739  3.18146  2.89801  2.37887  2.77519  2.98518  4.58477  3.61503
          0.01907  4.36503  5.08738  0.61958  0.77255  0.48576  0.95510
     12   2.16089  4.90615  3.04230  2.35110  4.15868  3.48575  3.68185  2.92608  2.30643  2.96563  3.97359  2.89224  3.87561  2.37956  2.56578  2.63195  2.89641  3.10710  5.39691  4.05523     52 a - - -
          2.68618  4.42225  2.77519  2.73123  3.46354  2.40513  3.72494  3.29354  2.67741  2.69355  4.24690  2.90347  2.73739  3.18146  2.89801  2.37887  2.77519  2.98518  4.58477  3.61503
          0.01907  4.36503  5.08738  0.61958  0.77255  0.48576  0.95510
     13   2.27444  5.04148  2.42964  2.27019  4.33710  3.45287  3.50893  3.57171  2.28280  2.99533  3.79876  2.94274  3.84523  2.63715  2.76866  2.29817  2.88971  3.40528  5.50480  3.89100     53 e - - -
          2.68618  4.42225  2.77519  2.73123  3.46354  2.40513  3.72494  3.29354  2.67741  2.69355  4.24690  2.90347  2.73739  3.18146  2.89801  2.37887  2.77519  2.98518  4.58477  3.61503
          0.01907  4.36503  5.08738  0.61958  0.77255  0.48576  0.95510
     14   1.89633  1.39363  4.18775  3.75630  3.99979  3.01983  4.47271  3.31562  3.66210  3.09294  3.97406  3.72376  3.95022  3.89631  3.87134  2.11697  2.87438  2.53874  5.45388  4.28135     54 c - - -
          2.68618  4.42225  2.77519  2.73123  3.46354  2.40513  3.72494  3.29354  2.67741  2.69355  4.24690  2.90347  2.73739  3.18146  2.89801  2.37887  2.77519  2.98518  4.58477  3.61503
          0.01907  4.36503  5.08738  0.61958  0.77255  0.48576  0.95510
     15   2.14639  4.23598  4.25194  3.67742  3.37009  3.91053  4.25762  1.48209  3.56211  2.15479  2.98519  3.89802  4.27764  3.79579  3.75717  2.87744  3.01789  2.09755  4.94405  3.75106     55 i - - -
          2.68618  4.42225  2.77519  2.73123  3.46354  2.40513  3.72494  3.29354  2.67741  2.69355  4.24690  2.90347  2.73739  3.18146  2.89801  2.37887  2.77519  2.98518  4.58477  3.61503
          0.01907  4.36503  5.08738  0.61958  0.77255  0.48576  0.95510
     16   2.18974  5.19756  2.23648  2.05474  4.52451  3.03471  3.66402  4.00394  2.39268  3.49561  4.24869  2.90453  3.85591  2.43025  2.80214  2.45746  2.94751  3.57955  5.63949  4.22839     56 e - - -
          2.68618  4.42225  2.77519  2.73123  3.46354  2.40513  3.72494  3.29354  2.67741  2.69355  4.24690  2.90347  2.73739  3.18146  2.89801  2.37887  2.77519  2.98518  4.58477  3.61503
          0.01907  4.36503  5.08738  0.61958  0.77255  0.48576  0.95510
     17   1.81603  4.89665  2.41701  2.26669  4.13906  3.48198  3.70305  3.55518  2.50688  2.89560  3.97141  3.00860  3.88460  2.85182  2.97440  2.70390  2.91102  3.11721  5.39820  3.42440     57 a - - -
          2.68618  4.42225  2.77519  2.73123  3.46354  2.40513  3.72494  3.29354  2.67741  2.69355  4.24690  2.90347  2.73739  3.18146  2.89801  2.37887  2.77519  2.98518  4.58477  3.61503
          0.01907  4.36503  5.08738  0.61958  0.77255  0.48576  0.95510
     18   2.90276  0.82764  4.60348  4.22784  3.76570  3.72378  4.75529  2.78874  3.96543  2.30342  3.88701  4.20181  4.37155  4.30207  4.10129  3.23117  3.31997  2.61810  5.42167  4.13842     58 c - - -
          2.68618  4.42225  2.77519  2.73123  3.46354  2.40513  3.72494  3.29354  2.67741  2.69355  4.24690  2.90347  2.73739  3.18146  2.89801  2.37887  2.77519  2.98518  4.58477  3.61503
          0.01907  4.36503  5.08738  0.61958  0.77255  0.48576  0.95510
     19   2.66079  4.87810  2.98722  2.49130  4.12101  3.31344  3.19506  3.54110  2.41001  2.80348  3.94749  2.30151  3.87664  2.53705  2.82889  2.69005  2.89178  2.71685  5.37539  3.12554     59 n - - -
          2.68618  4.42225  2.77519  2.73123  3.46354  2.40513  3.72494  3.29354  2.67741  2.69355  4.24690  2.90347  2.73739  3.18146  2.89801  2.37887  2.77519  2.98518  4.58477  3.61503
          0.01907  4.36503  5.08738  0.61958  0.77255  0.48576  0.95510
     20   1.96983  5.11383  2.86661  2.30187  4.43262  3.37576  3.46973  3.89715  2.20500  3.40544  4.16364  2.71443  3.84714  2.57855  2.45737  2.47193  2.85204  3.49073  5.56019  4.17030     60 a - - -
          2.68618  4.42225  2.77519  2.73123  3.46354  2.40513  3.72494  3.29354  2.67741  2.69355  4.24690  2.90347  2.73739  3.18146  2.89801  2.37887  2.77519  2.98518  4.58477  3.61503
          0.01907  4.36503  5.08738  0.61958  0.77255  0.48576  0.95510
     21   2.17859  1.49252  3.81659  3.32294  3.84400  3.39772  4.18653  3.12371  2.72208  2.90607  3.80130  3.55155  3.99322  3.53088  3.47179  2.77278  2.34388  2.82835  5.28072  4.07329     61 c - - -
          2.68618  4.42225  2.77519  2.73123  3.46354  2.40513  3.72494  3.29354  2.67741  2.69355  4.24690  2.90347  2.73739  3.18146  2.89801  2.37887  2.77519  2.98518  4.58477  3.61503
          0.01907  4.36503  5.08738  0.61958  0.77255  0.48576  0.95510
     22   1.95426  4.66568  3.18995  2.47079  3.85684  2.67632  3.32236  3.04354  2.61641  2.90332  3.75260  3.12430  3.92156  2.83888  3.04936  2.75169  2.88850  2.73138  5.20398  3.25924     62 a - - -
          2.68618  4.42225  2.77519  2.73123  3.46354  2.40513  3.72494  3.29354  2.67741  2.69355  4.24690  2.90347  2.73739  3.18146  2.89801  2.37887  2.77519  2.98518  4.58477  3.61503
          0.01907  4.36503  5.08738  0.61958  0.77255  0.48576  0.95510
     23   2.32270  5.00393  2.81222  2.15289  4.28679  3.45925  3.65454  3.39467  2.41942  3.19375  3.75980  2.71614  3.85123  2.30076  2.81490  2.65519  2.57405  3.06810  5.47584  4.10618     63 e - - -
          2.68618  4.42225  2.77519  2.73123  3.46354  2.40513  3.72494  3.29354  2.67741  2.69355  4.24690  2.90347  2.73739  3.18146  2.89801  2.37887  2.77519  2.98518  4.58477  3.61503
          0.01907  4.36503  5.08738  0.61958  0.77255  0.48576  0.95510
     24   1.62548  4.32321  3.75186  3.21257  3.62376  3.55189  4.07882  2.82403  3.15013  2.35233  3.58543  3.52441  4.04055  3.44221  3.46577  2.58752  2.36102  2.10263  5.09483  3.87566     64 a - - -
          2.68618  4.42225  2.77519  2.73123  3.46354  2.40513  3.72494  3.29354  2.67741  2.69355  4.24690  2.90347  2.73739  3.18146  2.89801  2.37887  2.77519  2.98518  4.58477  3.61503
          0.01907  4.36503  5.08738  0.61958  0.77255  0.48576  0.95510
     25   3.28398  0.32475  4.86485  4.73479  4.65700  3.77697  5.27954  3.92092  4.58151  3.79456  4.94010  4.60205  4.51603  4.90666  4.60757  3.55278  3.79248  3.62199  5.92745  4.93249     65 C - - -
          2.68618  4.42225  2.77519  2.73123  3.46354  2.40513  3.72494  3.29354  2.67741  2.69355  4.24690  2.90347  2.73739  3.18146  2.89801  2.37887  2.77519  2.98518  4.58477  3.61503
          0.01907  4.36503  5.08738  0.61958  0.77255  0.48576  0.95510
     26   2.52678  4.99882  2.43513  2.27400  4.25347  3.46953  3.48476  3.68549  2.51840  1.93601  4.06922  2.65656  3.89236  2.72138  2.99535  2.72395  2.95445  3.34111  5.48553  4.12604     66 l - - -
          2.68618  4.42225  2.77519  2.73123  3.46354  2.40513  3.72494  3.29354  2.67741  2.69355  4.24690  2.90347  2.73739  3.18146  2.89801  2.37887  2.77519  2.98518  4.58477  3.61503
          0.01907  4.36503  5.08738  0.61958  0.77255  0.48576  0.95510
     27   2.15302  4.62551  3.22588  2.66505  3.50235  2.94990  2.87129  3.06918  2.57239  2.85861  3.58937  3.14795  3.92935  2.97979  2.88176  2.55677  2.73993  2.92589  5.16969  3.05742     67 a - - -
          2.68618  4.42225  2.77519  2.73123  3.46354  2.40513  3.72494  3.29354  2.67741  2.69355  4.24690  2.90347  2.73739  3.18146  2.89801  2.37887  2.77519  2.98518  4.58477  3.61503
          0.01907  4.36503  5.08738  0.61958  0.77255  0.48576  0.95510
     28   2.66499  2.16908  3.44398  2.66707  3.60808  3.33815  2.51444  2.97873  2.82043  2.68158  3.04499  3.31586  3.99706  3.16135  3.18093  2.85511  2.90313  2.74207  5.03079  3.78269     68 c - - -
          2.68618  4.42225  2.77519  2.73123  3.46354  2.40513  3.72494  3.29354  2.67741  2.69355  4.24690  2.90347  2.73739  3.18146  2.89801  2.37887  2.77519  2.98518  4.58477  3.61503
          0.01907  4.36503  5.08738  0.61958  0.77255  0.48576  0.95510
     29   1.01588  1.97576  4.27058  3.90281  4.25171  3.15849  4.62769  3.54008  3.80230  3.34528  4.21351  3.76018  3.92750  4.03217  3.99011  2.38846  2.70690  3.09305  5.68809  4.53288     69 a - - -
          2.68618  4.42225  2.77519  2.73123  3.46354  2.40513  3.72494  3.29354  2.67741  2.69355  4.24690  2.90347  2.73739  3.18146  2.89801  2.37887  2.77519  2.98518  4.58477  3.61503
          0.01907  4.36503  5.08738  0.61958  0.77255  0.48576  0.95510
     30   2.13050  4.20049  3.95517  3.37859  3.32100  3.73798  4.04584  2.15034  3.28446  2.11222  2.62739  3.65472  4.11545  3.53614  3.52487  2.62499  2.41807  2.39103  4.82817  3.62729     70 l - - -
          2.68621  4.42228  2.77522  2.73126  3.46356  2.40510  3.72497  3.29357  2.67743  2.69357  4.24692  2.90342  2.73742  3.18149  2.89793  2.37885  2.77507  2.98521  4.58479  3.61506
          0.39504  1.97526  1.67333  0.26933  1.44347  0.48576  0.95510
     31   1.86746  4.83812  2.87940  2.28048  4.14684  3.39712  2.58773  3.57297  2.51893  3.17610  4.00060  2.97767  3.85588  2.87717  2.96100  2.39666  2.91771  3.23656  5.40848  4.07273     72 a - - -
          2.68618  4.42225  2.77519  2.73123  3.46354  2.40513  3.72494  3.29354  2.67741  2.69355  4.24690  2.90347  2.73739  3.18146  2.89801  2.37887  2.77519  2.98518  4.58477  3.61503
          0.02335  4.16481  4.88716  0.61958  0.77255  0.36054  1.19502
     32   2.73267  1.63841  4.17221  3.60434  3.42807  3.79120  4.22449  2.28532  3.42810  2.40546  3.40320  3.82052  4.21450  3.72169  3.05289  3.11116  2.99938  1.97666  4.98021  3.77967     73 c - - -
          2.68618  4.42225  2.77519  2.73123  3.46354  2.40513  3.72494  3.29354  2.67741  2.69355  4.24690  2.90347  2.73739  3.18146  2.89801  2.37887  2.77519  2.98518  4.58477  3.61503
          0.01907  4.36503  5.08738  0.61958  0.77255  0.48576  0.95510
     33   2.70205  4.43952  3.44856  2.87744  3.66237  3.07077  4.01981  2.99382  3.01571  1.26467  3.64430  3.42324  4.05489  3.36111  3.32836  2.59655  2.98442  2.76107  5.11678  3.87968     74 l - - -
          2.68618  4.42225  2.77519  2.73123  3.46354  2.40513  3.72494  3.29354  2.67741  2.69355  4.24690  2.90347  2.73739  3.18146  2.89801  2.37887  2.77519  2.98518  4.58477  3.61503
          0.01907  4.36503  5.08738  0.61958  0.77255  0.48576  0.95510
     34   2.69998  5.03529  3.02462  2.02343  4.32979  3.39085  3.66292  3.76689  2.08111  2.56992  3.46610  2.98738  3.87927  2.45079  2.46027  2.69593  2.92649  3.39921  5.48992  4.13563     75 e - - -
          2.68618  4.42225  2.77519  2.73123  3.46354  2.40513  3.72494  3.29354  2.67741  2.69355  4.24690  2.90347  2.73739  3.18146  2.89801  2.37887  2.77519  2.98518  4.58477  3.61503
          0.01907  4.36503  5.08738  0.61958  0.77255  0.48576  0.95510
     35   2.54354  5.19082  2.77931  1.68615  4.51016  2.56600  3.45754  3.98009  2.39619  3.49068  4.26009  2.67899  3.87916  2.81640  2.97593  2.31972  2.98586  3.57212  5.65092  4.24695     76 e - - -
          2.68618  4.42225  2.77519  2.73123  3.46354  2.40513  3.72494  3.29354  2.67741  2.69355  4.24690  2.90347  2.73739  3.18146  2.89801  2.37887  2.77519  2.98518  4.58477  3.61503
          0.01907  4.36503  5.08738  0.61958  0.77255  0.48576  0.95510
     36   2.55783  5.14082  2.57768  2.37130  4.46677  2.43503  3.64801  3.93833  2.25261  3.43954  4.19378  2.91741  3.02876  2.36765  2.74860  2.43304  2.91635  3.52267  5.58953  4.19008     77 k - - -
          2.68618  4.42225  2.77519  2.73123  3.46354  2.40513  3.72494  3.29354  2.67741  2.69355  4.24690  2.90347  2.73739  3.18146  2.89801  2.37887  2.77519  2.98518  4.58477  3.61503
          0.01907  4.36503  5.08738  0.61958  0.77255  0.48576  0.95510
     37   2.88548  5.36828  1.84326  2.33031  4.69065  1.78515  2.99777  4.18276  2.67508  3.68744  4.47924  2.59011  3.59354  2.93976  3.20656  2.82413  3.14602  3.76328  5.84769  4.40698     78 g - - -
          2.68618  4.42225  2.77519  2.73123  3.46354  2.40513  3.72494  3.29354  2.67741  2.69355  4.24690  2.90347  2.73739  3.18146  2.89801  2.37887  2.77519  2.98518  4.58477  3.61503
          0.05961  4.36503  3.09762  0.61958  0.77255  0.48576  0.95510
     38   2.49532  5.04521  2.52418  2.13941  4.34259  3.27339  3.64218  3.79591  2.22784  3.33039  4.10139  2.92966  3.10322  2.75820  2.77906  2.64459  2.80134  2.55277  5.50889  4.12812     79 e - - -
          2.68618  4.42225  2.77519  2.73123  3.46354  2.40513  3.72494  3.29354  2.67741  2.69355  4.24690  2.90347  2.73739  3.18146  2.89801  2.37887  2.77519  2.98518  4.58477  3.61503
          0.01985  4.32527  5.04761  0.61958  0.77255  0.45192  1.01172
     39   2.43042  5.12108  2.86682  2.25933  4.44464  3.35592  2.78027  3.91231  2.00575  3.41477  4.16889  2.92536  3.60124  2.58794  2.65627  2.64511  2.44846  3.50042  5.56449  4.17182     80 k - - -
          2.68618  4.42225  2.77519  2.73123  3.46354  2.40513  3.72494  3.29354  2.67741  2.69355  4.24690  2.90347  2.73739  3.18146  2.89801  2.37887  2.77519  2.98518  4.58477  3.61503
          0.01907  4.36503  5.08738  0.61958  0.77255  0.48576  0.95510
     40   2.42035  4.90336  2.68993  2.16493  4.15440  3.47793  3.31805  3.57893  2.40988  2.92727  3.05551  2.99739  3.73817  2.73643  2.93700  2.48929  2.88874  2.69135  5.39680  4.05103     81 e - - -
          2.68618  4.42225  2.77519  2.73123  3.46354  2.40513  3.72494  3.29354  2.67741  2.69355  4.24690  2.90347  2.73739  3.18146  2.89801  2.37887  2.77519  2.98518  4.58477  3.61503
          0.01907  4.36503  5.08738  0.61958  0.77255  0.48576  0.95510
     41   2.56060  4.44488  3.23823  2.68572  3.59706  3.61148  3.88024  2.93751  2.86281  2.37260  1.77919  3.32183  4.00680  3.18275  3.22918  2.64845  2.91004  2.70829  5.03104  3.78708     82 m - - -
          2.68618  4.42225  2.77519  2.73123  3.46354  2.40513  3.72494  3.29354  2.67741  2.69355  4.24690  2.90347  2.73739  3.18146  2.89801  2.37887  2.77519  2.98518  4.58477  3.61503
          0.01907  4.36503  5.08738  0.61958  0.77255  0.48576  0.95510
     42   1.77672  4.86583  3.06645  2.52089  4.14815  3.12250  3.71175  3.56599  2.31948  3.16322  3.97414  3.03369  2.91629  2.76639  2.76315  2.69985  2.80958  3.06174  5.39835  4.06609     83 a - - -
          2.68618  4.42225  2.77519  2.73123  3.46354  2.40513  3.72494  3.29354  2.67741  2.69355  4.24690  2.90347  2.73739  3.18146  2.89801  2.37887  2.77519  2.98518  4.58477  3.61503
          0.01907  4.36503  5.08738  0.61958  0.77255  0.48576  0.95510
     43   2.13215  5.13573  2.33385  2.31643  4.45672  3.25448  3.66003  3.92145  2.27675  3.43043  4.19260  2.92988  3.85903  2.77077  2.12173  2.67230  2.82090  3.51527  5.58618  4.19436     84 r - - -
          2.68618  4.42225  2.77519  2.73123  3.46354  2.40513  3.72494  3.29354  2.67741  2.69355  4.24690  2.90347  2.73739  3.18146  2.89801  2.37887  2.77519  2.98518  4.58477  3.61503
          0.01907  4.36503  5.08738  0.61958  0.77255  0.48576  0.95510
     44   2.84944  1.04722  3.95556  3.54455  3.60212  3.60892  2.28680  3.39563  3.29345  3.08843  4.05133  3.75953  4.19984  3.72821  3.52268  3.06829  3.21474  3.12157  5.09622  3.69271     85 c - - -
          2.68618  4.42225  2.77519  2.73123  3.46354  2.40513  3.72494  3.29354  2.67741  2.69355  4.24690  2.90347  2.73739  3.18146  2.89801  2.37887  2.77519  2.98518  4.58477  3.61503
          0.01907  4.36503  5.08738  0.61958  0.77255  0.48576  0.95510
     45   2.02659  4.28282  4.57887  3.99775  2.90527  4.09681  4.44358  1.51208  3.86193  2.00269  2.87359  4.14988  4.42898  4.04408  3.98799  3.40849  3.13162  1.96138  4.99596  3.82553     86 i - - -
          2.68618  4.42225  2.77519  2.73123  3.46354  2.40513  3.72494  3.29354  2.67741  2.69355  4.24690  2.90347  2.73739  3.18146  2.89801  2.37887  2.77519  2.98518  4.58477  3.61503
          0.01907  4.36503  5.08738  0.61958  0.77255  0.48576  0.95510
     46   2.10202  5.09179  2.95764  2.30536  4.40490  3.46170  3.50125  3.86134  2.25299  3.37891  4.14442  2.70849  3.85579  2.58672  2.28708  2.49939  2.62218  3.46588  5.54047  4.16103     87 a - - -
          2.68618  4.42225  2.77519  2.73123  3.46354  2.40513  3.72494  3.29354  2.67741  2.69355  4.24690  2.90347  2.73739  3.18146  2.89801  2.37887  2.77519  2.98518  4.58477  3.61503
          0.01907  4.36503  5.08738  0.61958  0.77255  0.48576  0.95510
     47   2.68109  4.50797  3.36059  2.88103  3.72351  3.55708  3.90475  3.09184  2.82940  1.55515  3.67789  2.88655  4.00043  3.03736  3.18756  2.23558  2.79835  2.84187  5.13477  3.88124     88 l - - -
          2.68618  4.42225  2.77519  2.73123  3.46354  2.40513  3.72494  3.29354  2.67741  2.69355  4.24690  2.90347  2.73739  3.18146  2.89801  2.37887  2.77519  2.98518  4.58477  3.61503
          0.01907  4.36503  5.08738  0.61958  0.77255  0.48576  0.95510
     48   2.45946  3.42664  2.17377  2.95407  3.60040  3.63097  3.92086  2.82878  2.91805  2.63618  2.64297  3.36981  4.02744  3.22693  3.28678  2.88406  2.91342  2.13241  5.05029  3.80817     89 v - - -
          2.68618  4.42225  2.77519  2.73123  3.46354  2.40513  3.72494  3.29354  2.67741  2.69355  4.24690  2.90347  2.73739  3.18146  2.89801  2.37887  2.77519  2.98518  4.58477  3.61503
          0.01907  4.36503  5.08738  0.61958  0.77255  0.48576  0.95510
     49   2.64730  4.23240  3.79085  3.21553  3.34889  3.68888  3.96639  2.50408  3.13624  2.18572  2.29697  3.09037  4.06367  3.40709  3.29927  2.35660  2.57629  2.49346  3.82551  3.62083     90 l - - -
          2.68618  4.42225  2.77519  2.73123  3.46354  2.40513  3.72494  3.29354  2.67741  2.69355  4.24690  2.90347  2.73739  3.18146  2.89801  2.37887  2.77519  2.98518  4.58477  3.61503
          0.01907  4.36503  5.08738  0.61958  0.77255  0.48576  0.95510
     50   2.55534  5.29932  1.76056  2.13181  4.61840  3.42866  3.72148  4.10413  2.52764  3.59458  4.36079  2.55854  3.89315  2.15646  3.04017  2.74098  3.03812  3.40231  5.74131  4.31388     91 d - - -
          2.68618  4.42225  2.77519  2.73123  3.46354  2.40513  3.72494  3.29354  2.67741  2.69355  4.24690  2.90347  2.73739  3.18146  2.89801  2.37887  2.77519  2.98518  4.58477  3.61503
          0.01907  4.36503  5.08738  0.61958  0.77255  0.48576  0.95510
     51   2.92335  1.55465  4.57341  4.00704  3.36651  4.07443  4.50263  2.27816  3.85520  1.96843  2.53402  4.16376  4.44516  4.06232  3.99994  3.40573  3.17911  1.98677  5.07495  3.90103     92 c - - -
          2.68618  4.42225  2.77519  2.73123  3.46354  2.40513  3.72494  3.29354  2.67741  2.69355  4.24690  2.90347  2.73739  3.18146  2.89801  2.37887  2.77519  2.98518  4.58477  3.61503
          0.01907  4.36503  5.08738  0.61958  0.77255  0.48576  0.95510
     52   1.45233  4.55457  3.31267  2.56683  3.83184  3.52634  3.93019  3.12790  2.84057  2.21105  3.76443  3.28578  3.99546  3.18666  3.21811  2.70976  2.95691  2.86888  5.23549  3.97391     93 a - - -
          2.68618  4.42225  2.77519  2.73123  3.46354  2.40513  3.72494  3.29354  2.67741  2.69355  4.24690  2.90347  2.73739  3.18146  2.89801  2.37887  2.77519  2.98518  4.58477  3.61503
          0.01907  4.36503  5.08738  0.61958  0.77255  0.48576  0.95510
     53   1.94858  5.19147  2.59726  1.97888  4.51507  3.27523  3.66839  3.99123  2.43261  3.48757  4.24426  2.59754  3.86014  2.47642  2.70174  2.67882  2.95229  3.57180  5.63510  4.22735     94 a - - -
          2.68618  4.42225  2.77519  2.73123  3.46354  2.40513  3.72494  3.29354  2.67741  2.69355  4.24690  2.90347  2.73739  3.18146  2.89801  2.37887  2.77519  2.98518  4.58477  3.61503
          0.01907  4.36503  5.08738  0.61958  0.77255  0.48576  0.95510
     54   2.44083  4.11785  4.36283  3.76985  2.76504  3.84479  4.16907  1.83915  3.62026  1.91716  2.91539  3.90065  4.20607  3.80804  3.73812  2.99205  2.45999  2.11351  4.76043  3.57743     95 i - - -
          2.68618  4.42225  2.77519  2.73123  3.46354  2.40513  3.72494  3.29354  2.67741  2.69355  4.24690  2.90347  2.73739  3.18146  2.89801  2.37887  2.77519  2.98518  4.58477  3.61503
          0.01907  4.36503  5.08738  0.61958  0.77255  0.48576  0.95510
     55   2.43729  0.65920  4.54870  4.32992  4.33884  3.35381  4.94157  3.36896  4.13231  3.35623  4.41020  4.06889  4.13972  4.42634  4.22909  2.88342  3.14687  3.03280  5.83473  4.67035     96 C - - -
          2.68618  4.42225  2.77519  2.73123  3.46354  2.40513  3.72494  3.29354  2.67741  2.69355  4.24690  2.90347  2.73739  3.18146  2.89801  2.37887  2.77519  2.98518  4.58477  3.61503
          0.01907  4.36503  5.08738  0.61958  0.77255  0.48576  0.95510
     56   2.26260  5.10097  2.95045  2.36249  4.42356  2.82103  3.66271  3.87722  2.38285  3.39510  4.16525  2.65885  3.86980  2.29830  2.14397  2.68476  2.85651  3.48321  5.55580  4.18108     97 r - - -
          2.68618  4.42225  2.77519  2.73123  3.46354  2.40513  3.72494  3.29354  2.67741  2.69355  4.24690  2.90347  2.73739  3.18146  2.89801  2.37887  2.77519  2.98518  4.58477  3.61503
          0.01907  4.36503  5.08738  0.61958  0.77255  0.48576  0.95510
     57   2.07561  3.96253  4.02419  3.45377  3.05908  3.74890  4.11323  2.55893  3.35759  1.71190  3.33411  3.71120  4.14681  3.60496  3.59138  3.04304  2.13632  2.32968  4.88318  3.68470     98 l - - -
          2.68618  4.42225  2.77519  2.73123  3.46354  2.40513  3.72494  3.29354  2.67741  2.69355  4.24690  2.90347  2.73739  3.18146  2.89801  2.37887  2.77519  2.98518  4.58477  3.61503
          0.01907  4.36503  5.08738  0.61958  0.77255  0.48576  0.95510
     58   1.70184  3.51408  3.86863  3.31801  3.49201  3.40799  4.07623  2.80583  3.23915  1.90346  3.47803  3.58134  4.03939  3.50610  3.51206  2.47109  2.74662  2.44590  4.97119  3.76548     99 a - - -
          2.68618  4.42225  2.77519  2.73123  3.46354  2.40513  3.72494  3.29354  2.67741  2.69355  4.24690  2.90347  2.73739  3.18146  2.89801  2.37887  2.77519  2.98518  4.58477  3.61503
          0.01907  4.36503  5.08738  0.61958  0.77255  0.48576  0.95510
     59   1.77745  4.64960  3.22398  2.66362  3.84949  3.53854  3.76759  3.23241  2.62286  2.80289  3.32171  3.14602  3.93055  2.54265  2.80065  2.50380  2.89430  2.73398  5.19979  3.91387    100 a - - -
          2.68618  4.42225  2.77519  2.73123  3.46354  2.40513  3.72494  3.29354  2.67741  2.69355  4.24690  2.90347  2.73739  3.18146  2.89801  2.37887  2.77519  2.98518  4.58477  3.61503
          0.01907  4.36503  5.08738  0.61958  0.77255  0.48576  0.95510
     60   2.13531  5.14273  2.68147  2.36923  4.46585  3.17900  3.24018  3.93764  2.14520  3.43885  4.19296  2.33364  3.84567  2.57838  2.88796  2.50363  2.85088  3.52230  5.58904  4.18895    101 a - - -
          2.68618  4.42225  2.77519  2.73123  3.46354  2.40513  3.72494  3.29354  2.67741  2.69355  4.24690  2.90347  2.73739  3.18146  2.89801  2.37887  2.77519  2.98518  4.58477  3.61503
          0.01907  4.36503  5.08738  0.61958  0.77255  0.48576  0.95510
     61   2.34962  4.14317  4.36689  3.77317  2.18414  3.85762  4.16615  2.48621  3.62331  1.65642  2.88327  3.90805  4.21357  3.80426  3.74008  3.15664  2.85868  2.17945  4.74273  3.11175    102 l - - -
          2.68618  4.42225  2.77519  2.73123  3.46354  2.40513  3.72494  3.29354  2.67741  2.69355  4.24690  2.90347  2.73739  3.18146  2.89801  2.37887  2.77519  2.98518  4.58477  3.61503
          0.01907  4.36503  5.08738  0.61958  0.77255  0.48576  0.95510
     62   2.01876  4.41530  4.32739  3.75928  3.33793  4.05514  4.40105  2.31029  3.63816  1.76637  1.69003  4.01958  4.40125  3.87303  3.84768  3.36032  3.18213  2.32899  5.06328  3.90251    103 m - - -
          2.68618  4.42225  2.77519  2.73123  3.46354  2.40513  3.72494  3.29354  2.67741  2.69355  4.24690  2.90347  2.73739  3.18146  2.89801  2.37887  2.77519  2.98518  4.58477  3.61503
          0.01907  4.36503  5.08738  0.61958  0.77255  0.48576  0.95510
     63   1.78535  4.15980  3.36310  2.60390  3.67570  3.34309  3.83325  3.04259  2.77276  2.15085  3.44685  2.95890  3.96623  3.09770  3.16618  2.74521  2.88739  2.79463  5.08068  3.82307    104 a - - -
          2.68618  4.42225  2.77519  2.73123  3.46354  2.40513  3.72494  3.29354  2.67741  2.69355  4.24690  2.90347  2.73739  3.18146  2.89801  2.37887  2.77519  2.98518  4.58477  3.61503
          0.01907  4.36503  5.08738  0.61958  0.77255  0.48576  0.95510
     64   2.69348  4.85817  3.12105  2.55298  4.10044  3.41139  3.70674  3.32246  2.45667  2.70289  3.73435  3.06073  3.90832  2.32322  1.93928  2.48659  2.80474  3.19267  5.35483  4.03806    105 r - - -
          2.68618  4.42225  2.77519  2.73123  3.46354  2.40513  3.72494  3.29354  2.67741  2.69355  4.24690  2.90347  2.73739  3.18146  2.89801  2.37887  2.77519  2.98518  4.58477  3.61503
          0.01907  4.36503  5.08738  0.61958  0.77255  0.48576  0.95510
     65   2.71726  5.29420  2.46075  2.13447  4.61530  2.31364  3.71740  4.10066  2.51695  3.58970  4.35486  1.97156  3.89166  2.47978  2.88040  2.73774  3.03321  3.67460  5.73494  4.30956    106 n - - -
          2.68618  4.42225  2.77519  2.73123  3.46354  2.40513  3.72494  3.29354  2.67741  2.69355  4.24690  2.90347  2.73739  3.18146  2.89801  2.37887  2.77519  2.98518  4.58477  3.61503
          0.01907  4.36503  5.08738  0.61958  0.77255  0.48576  0.95510
     66   2.44350  4.37316  3.74032  3.43077  4.44833  2.91850  4.45529  3.82582  3.44234  3.56642  4.41361  3.55837  3.92408  3.74204  3.74013  0.81066  2.93125  2.71435  5.81873  4.59350    107 s - - -
          2.68618  4.42225  2.77519  2.73123  3.46354  2.40513  3.72494  3.29354  2.67741  2.69355  4.24690  2.90347  2.73739  3.18146  2.89801  2.37887  2.77519  2.98518  4.58477  3.61503
          0.01907  4.36503  5.08738  0.61958  0.77255  0.48576  0.95510
     67   2.52733  5.15680  2.61550  1.91888  4.48678  3.43787  3.64168  3.96303  2.04211  3.45580  4.20484  2.91072  3.13456  2.74548  2.79451  2.45846  2.61799  3.53999  5.59886  4.19484    108 e - - -
          2.68618  4.42225  2.77519  2.73123  3.46354  2.40513  3.72494  3.29354  2.67741  2.69355  4.24690  2.90347  2.73739  3.18146  2.89801  2.37887  2.77519  2.98518  4.58477  3.61503
          0.01907  4.36503  5.08738  0.61958  0.77255  0.48576  0.95510
     68   2.72330  4.30803  3.83212  3.26257  2.12465  3.74721  2.59607  2.71099  3.16162  1.93634  3.41144  3.57544  4.11831  3.44253  3.00070  2.93914  2.95395  2.57558  4.69419  3.19570    109 l - - -
          2.68618  4.42225  2.77519  2.73123  3.46354  2.40513  3.72494  3.29354  2.67741  2.69355  4.24690  2.90347  2.73739  3.18146  2.89801  2.37887  2.77519  2.98518  4.58477  3.61503
          0.01907  4.36503  5.08738  0.61958  0.77255  0.48576  0.95510
     69   2.02692  4.40144  3.49046  2.92680  3.55728  3.60783  3.17094  2.83139  2.88149  2.24354  3.51651  3.34065  3.99811  3.19170  3.24504  2.40064  2.58251  2.37189  4.99372  3.75396    110 a - - -
          2.68618  4.42225  2.77519  2.73123  3.46354  2.40513  3.72494  3.29354  2.67741  2.69355  4.24690  2.90347  2.73739  3.18146  2.89801  2.37887  2.77519  2.98518  4.58477  3.61503
          0.01907  4.36503  5.08738  0.61958  0.77255  0.48576  0.95510
     70   2.39709  5.04380  2.96011  2.22682  4.34049  3.36268  3.64904  3.79199  2.29128  3.32788  4.09933  2.87450  2.52910  2.68017  2.63061  2.41262  2.71617  3.29521  5.50718  3.93898    111 e - - -
          2.68618  4.42225  2.77519  2.73123  3.46354  2.40513  3.72494  3.29354  2.67741  2.69355  4.24690  2.90347  2.73739  3.18146  2.89801  2.37887  2.77519  2.98518  4.58477  3.61503
          0.01907  4.36503  5.08738  0.61958  0.77255  0.48576  0.95510
     71   2.05920  5.06708  2.76057  2.28717  4.37090  3.45106  3.18233  3.82794  2.22811  2.85202  4.11928  2.87650  3.66109  2.45921  2.77584  2.64676  2.89428  3.43546  5.52438  3.92366    112 a - - -
          2.68618  4.42225  2.77519  2.73123  3.46354  2.40513  3.72494  3.29354  2.67741  2.69355  4.24690  2.90347  2.73739  3.18146  2.89801  2.37887  2.77519  2.98518  4.58477  3.61503
          0.01907  4.36503  5.08738  0.61958  0.77255  0.48576  0.95510
     72   2.61960  4.12179  4.35364  3.75893  3.19043  3.83899  4.15656  2.11327  3.60735  1.69948  2.64650  3.89204  4.19811  3.53709  3.72433  3.13772  2.77563  1.92347  4.74448  3.08641    113 l - - -
          2.68618  4.42225  2.77519  2.73123  3.46354  2.40513  3.72494  3.29354  2.67741  2.69355  4.24690  2.90347  2.73739  3.18146  2.89801  2.37887  2.77519  2.98518  4.58477  3.61503
          0.01907  4.36503  5.08738  0.61958  0.77255  0.48576  0.95510
     73   1.66436  1.46669  4.27007  3.81407  3.79935  3.44754  4.48204  2.81737  3.67200  2.44314  3.77406  3.84224  4.09673  3.93944  3.86789  2.86478  2.97801  2.57064  5.34364  4.14656    114 c - - -
          2.68618  4.42225  2.77519  2.73123  3.46354  2.40513  3.72494  3.29354  2.67741  2.69355  4.24690  2.90347  2.73739  3.18146  2.89801  2.37887  2.77519  2.98518  4.58477  3.61503
          0.01907  4.36503  5.08738  0.61958  0.77255  0.48576  0.95510
     74   2.09412  5.05608  2.96475  2.19907  4.35770  3.02682  3.64925  3.61444  2.03037  3.34079  4.11138  2.94867  3.85253  2.52246  2.73053  2.65795  2.71957  3.33465  5.51519  4.13890    115 k - - -
          2.68618  4.42225  2.77519  2.73123  3.46354  2.40513  3.72494  3.29354  2.67741  2.69355  4.24690  2.90347  2.73739  3.18146  2.89801  2.37887  2.77519  2.98518  4.58477  3.61503
          0.01907  4.36503  5.08738  0.61958  0.77255  0.48576  0.95510
     75   2.85579  4.46412  2.61949  3.29864  3.56118  3.89360  4.20529  2.38646  3.26493  1.64725  3.47740  3.68368  4.26715  3.55693  3.59440  3.17583  3.09697  1.62679  5.16443  3.93687    116 v - - -
          2.68618  4.42225  2.77519  2.73123  3.46354  2.40513  3.72494  3.29354  2.67741  2.69355  4.24690  2.90347  2.73739  3.18146  2.89801  2.37887  2.77519  2.98518  4.58477  3.61503
          0.01907  4.36503  5.08738  0.61958  0.77255  0.48576  0.95510
     76   1.51005  1.08675  4.44260  4.14946  4.30227  3.21571  4.79756  3.38303  4.00645  3.33765  4.28580  3.89789  4.00246  4.24277  4.13662  2.69687  2.96240  2.99419  5.78174  4.63142    117 c - - -
          2.68618  4.42225  2.77519  2.73123  3.46354  2.40513  3.72494  3.29354  2.67741  2.69355  4.24690  2.90347  2.73739  3.18146  2.89801  2.37887  2.77519  2.98518  4.58477  3.61503
          0.01907  4.36503  5.08738  0.61958  0.77255  0.48576  0.95510
     77   1.40619  4.48648  3.53418  2.99085  3.63572  3.63446  3.95557  2.92114  2.89244  2.37128  3.07580  3.39819  4.05182  2.91144  3.23923  2.90977  2.96317  2.71797  5.10881  3.86858    118 a - - -
          2.68618  4.42225  2.77519  2.73123  3.46354  2.40513  3.72494  3.29354  2.67741  2.69355  4.24690  2.90347  2.73739  3.18146  2.89801  2.37887  2.77519  2.98518  4.58477  3.61503
          0.01907  4.36503  5.08738  0.61958  0.77255  0.48576  0.95510
     78   2.71662  5.21060  2.08980  1.89596  4.54318  3.43886  3.66108  4.02381  2.36970  3.33263  4.25919  2.90704  3.85814  2.43310  2.51681  2.48996  2.95103  3.59545  5.64517  4.23514    119 e - - -
          2.68618  4.42225  2.77519  2.73123  3.46354  2.40513  3.72494  3.29354  2.67741  2.69355  4.24690  2.90347  2.73739  3.18146  2.89801  2.37887  2.77519  2.98518  4.58477  3.61503
          0.01907  4.36503  5.08738  0.61958  0.77255  0.48576  0.95510
     79   2.15451  4.37300  4.74115  4.17957  3.52130  4.29796  4.70226  1.39900  4.06049  2.02917  3.04730  4.35098  4.61641  4.26648  4.21009  3.62617  3.26537  1.54441  5.25431  4.07329    120 i - - -
          2.68618  4.42225  2.77519  2.73123  3.46354  2.40513  3.72494  3.29354  2.67741  2.69355  4.24690  2.90347  2.73739  3.18146  2.89801  2.37887  2.77519  2.98518  4.58477  3.61503
          0.01907  4.36503  5.08738  0.61958  0.77255  0.48576  0.95510
     80   3.28398  0.32475  4.86485  4.73479  4.65700  3.77697  5.27954  3.92092  4.58151  3.79456  4.94010  4.60205  4.51603  4.90666  4.60757  3.55278  3.79248  3.62199  5.92745  4.93249    121 C - - -
          2.68618  4.42225  2.77519  2.73123  3.46354  2.40513  3.72494  3.29354  2.67741  2.69355  4.24690  2.90347  2.73739  3.18146  2.89801  2.37887  2.77519  2.98518  4.58477  3.61503
          0.01907  4.36503  5.08738  0.61958  0.77255  0.48576  0.95510
     81   2.48343  5.18523  2.44664  2.02726  4.52414  3.43904  3.63955  4.00543  2.18671  3.48573  4.22991  2.70579  3.84349  2.46032  2.33395  2.64961  2.81342  3.57304  5.61813  4.21062    122 e - - -
          2.68618  4.42225  2.77519  2.73123  3.46354  2.40513  3.72494  3.29354  2.67741  2.69355  4.24690  2.90347  2.73739  3.18146  2.89801  2.37887  2.77519  2.98518  4.58477  3.61503
          0.01907  4.36503  5.08738  0.61958  0.77255  0.48576  0.95510
     82   1.78225  4.90555  2.77104  2.43434  4.15952  3.47932  3.68526  3.58331  2.47164  3.17238  3.97664  3.00146  3.87353  2.33709  2.85626  2.62919  2.79296  3.10746  4.63676  4.05731    123 a - - -
          2.68618  4.42225  2.77519  2.73123  3.46354  2.40513  3.72494  3.29354  2.67741  2.69355  4.24690  2.90347  2.73739  3.18146  2.89801  2.37887  2.77519  2.98518  4.58477  3.61503
          0.01907  4.36503  5.08738  0.61958  0.77255  0.48576  0.95510
     83   2.53287  0.78769  4.47757  4.20678  4.27350  3.29255  4.83722  3.28801  4.00021  3.27768  4.29094  3.96899  4.07235  4.29399  4.11940  2.78972  2.51979  2.94564  5.78004  4.61074    124 c - - -
          2.68618  4.42225  2.77519  2.73123  3.46354  2.40513  3.72494  3.29354  2.67741  2.69355  4.24690  2.90347  2.73739  3.18146  2.89801  2.37887  2.77519  2.98518  4.58477  3.61503
          0.01907  4.36503  5.08738  0.61958  0.77255  0.48576  0.95510
     84   1.79899  4.78720  3.09602  2.14214  4.02268  2.85289  3.73023  3.23469  2.48125  3.05107  3.39127  3.06458  3.90141  2.89950  2.99639  2.72318  2.90222  3.11450  5.32021  4.00363    125 a - - -
          2.68618  4.42225  2.77519  2.73123  3.46354  2.40513  3.72494  3.29354  2.67741  2.69355  4.24690  2.90347  2.73739  3.18146  2.89801  2.37887  2.77519  2.98518  4.58477  3.61503
          0.01907  4.36503  5.08738  0.61958  0.77255  0.48576  0.95510
     85   2.47150  5.16939  2.53000  1.84361  4.50433  3.43811  3.63745  3.98362  2.21209  3.46915  4.21456  2.84666  3.84047  2.41230  2.59815  2.55981  2.91253  3.36503  5.60596  4.19995    126 e - - -
          2.68618  4.42225  2.77519  2.73123  3.46354  2.40513  3.72494  3.29354  2.67741  2.69355  4.24690  2.90347  2.73739  3.18146  2.89801  2.37887  2.77519  2.98518  4.58477  3.61503
          0.01907  4.36503  5.08738  0.61958  0.77255  0.48576  0.95510
     86   2.31211  5.15946  2.72058  1.39014  4.54023  3.42600  3.79678  3.99579  2.61841  3.53792  4.33597  2.95899  3.92631  2.81231  3.10456  2.16771  3.07035  3.59684  5.72074  4.32831    127 e - - -
          2.68618  4.42225  2.77519  2.73123  3.46354  2.40513  3.72494  3.29354  2.67741  2.69355  4.24690  2.90347  2.73739  3.18146  2.89801  2.37887  2.77519  2.98518  4.58477  3.61503
          0.01907  4.36503  5.08738  0.61958  0.77255  0.48576  0.95510
     87   3.28398  0.32475  4.86485  4.73479  4.65700  3.77697  5.27954  3.92092  4.58151  3.79456  4.94010  4.60205  4.51603  4.90666  4.60757  3.55278  3.79248  3.62199  5.92745  4.93249    128 C - - -
          2.68618  4.42225  2.77519  2.73123  3.46354  2.40513  3.72494  3.29354  2.67741  2.69355  4.24690  2.90347  2.73739  3.18146  2.89801  2.37887  2.77519  2.98518  4.58477  3.61503
          0.01907  4.36503  5.08738  0.61958  0.77255  0.48576  0.95510
     88   2.38697  5.10690  2.71977  2.08500  4.42586  3.02373  3.63573  3.72001  2.00005  3.40077  4.15574  2.92263  3.83846  2.74194  2.59885  2.46737  2.89481  3.15518  5.55577  4.16216    129 k - - -
          2.68618  4.42225  2.77519  2.73123  3.46354  2.40513  3.72494  3.29354  2.67741  2.69355  4.24690  2.90347  2.73739  3.18146  2.89801  2.37887  2.77519  2.98518  4.58477  3.61503
          0.01907  4.36503  5.08738  0.61958  0.77255  0.48576  0.95510
     89   2.42962  5.14942  2.84054  2.40588  4.48485  3.46823  3.24551  3.94882  1.83448  3.44100  4.19754  2.94417  3.86156  2.39372  2.36483  2.41051  2.92913  3.53598  5.57910  4.19619    130 k - - -
          2.68618  4.42225  2.77519  2.73123  3.46354  2.40513  3.72494  3.29354  2.67741  2.69355  4.24690  2.90347  2.73739  3.18146  2.89801  2.37887  2.77519  2.98518  4.58477  3.61503
          0.06969  4.36503  2.90766  0.61958  0.77255  0.48576  0.95510
     90   2.85315  4.53227  3.71098  3.16300  2.89143  3.80049  1.61598  2.96286  3.06444  2.18538  3.57762  3.52120  4.17087  3.37767  3.38446  3.06297  3.08374  2.52262  4.58489  2.92747    131 h - - -
          2.68618  4.42225  2.77519  2.73123  3.46354  2.40513  3.72494  3.29354  2.67741  2.69355  4.24690  2.90347  2.73739  3.18146  2.89801  2.37887  2.77519  2.98518  4.58477  3.61503
          0.02005  4.31539  5.03773  0.61958  0.77255  0.44442  1.02497
     91   2.06018  5.14871  2.40173  2.14342  4.47135  2.98046  3.64953  3.94397  2.29549  3.44478  4.19902  2.91393  3.84679  2.60938  2.77092  2.58359  2.68437  3.52798  5.59498  4.19331    132 a - - -
          2.68618  4.42225  2.77519  2.73123  3.46354  2.40513  3.72494  3.29354  2.67741  2.69355  4.24690  2.90347  2.73739  3.18146  2.89801  2.37887  2.77519  2.98518  4.58477  3.61503
          0.01907  4.36503  5.08738  0.61958  0.77255  0.48576  0.95510
     92   2.46176  5.08822  2.63204  2.00120  4.39934  3.06092  3.01053  3.86231  2.27232  3.37887  3.32170  2.92690  3.60816  2.74756  2.87595  2.46018  2.89298  3.46055  5.54158  3.83963    133 e - - -
          2.68618  4.42225  2.77519  2.73123  3.46354  2.40513  3.72494  3.29354  2.67741  2.69355  4.24690  2.90347  2.73739  3.18146  2.89801  2.37887  2.77519  2.98518  4.58477  3.61503
          0.01907  4.36503  5.08738  0.61958  0.77255  0.48576  0.95510
     93   2.56623  5.05812  2.47050  2.28713  4.35935  3.00791  3.10286  3.81487  2.05901  3.34398  2.96537  2.93866  3.84441  2.70241  2.78293  2.64624  2.89206  3.42505  4.71054  4.13557    134 k - - -
          2.68592  4.42234  2.77528  2.73132  3.46363  2.40518  3.72339  3.29363  2.67750  2.69364  4.24673  2.90356  2.73732  3.18133  2.89810  2.37896  2.77528  2.98527  4.58486  3.61512
          0.42018  1.55642  2.02355  0.70546  0.68099  0.48576  0.95510
     94   2.96886  5.29207  2.62968  1.65638  4.40704  3.45883  1.62470  4.06361  2.58304  3.58227  4.43649  2.96562  3.98331  2.98056  2.99544  2.92339  3.22235  3.70209  5.62980  4.20890    138 h - - -
          2.68618  4.42225  2.77519  2.73123  3.46354  2.40513  3.72494  3.29354  2.67741  2.69355  4.24690  2.90347  2.73739  3.18146  2.89801  2.37887  2.77519  2.98518  4.58477  3.61503
          0.02185  4.23034  4.95269  0.61958  0.77255  0.65829  0.72926
     95   3.06663  0.43469  4.64341  4.47528  4.40553  3.60013  5.04605  3.62715  4.31194  3.51728  4.65507  4.37091  4.33247  4.64341  4.36696  3.33680  3.56417  3.34265  5.72533  4.68616    139 C - - -
          2.68618  4.42225  2.77519  2.73123  3.46354  2.40513  3.72494  3.29354  2.67741  2.69355  4.24690  2.90347  2.73739  3.18146  2.89801  2.37887  2.77519  2.98518  4.58477  3.61503
          0.02185  4.23034  4.95269  0.61958  0.77255  0.39127  1.12763
     96   2.72627  5.19303  2.70845  2.15934  4.54028  3.47481  3.64823  4.00744  1.87265  3.26771  4.23962  2.94613  3.87270  2.05131  2.44219  2.69081  2.95284  3.58628  5.61023  4.22648    140 k - - -
          2.68618  4.42225  2.77519  2.73123  3.46354  2.40513  3.72494  3.29354  2.67741  2.69355  4.24690  2.90347  2.73739  3.18146  2.89801  2.37887  2.77519  2.98518  4.58477  3.61503
          0.01907  4.36503  5.08738  0.61958  0.77255  0.48576  0.95510
     97   1.97217  5.11785  2.63179  1.98473  4.43418  3.44475  3.64700  3.90023  2.26933  3.41047  4.16912  2.92382  3.84670  2.65986  2.69417  2.57087  2.82147  3.33252  5.56788  4.17413    141 a - - -
          2.68618  4.42225  2.77519  2.73123  3.46354  2.40513  3.72494  3.29354  2.67741  2.69355  4.24690  2.90347  2.73739  3.18146  2.89801  2.37887  2.77519  2.98518  4.58477  3.61503
          0.01907  4.36503  5.08738  0.61958  0.77255  0.48576  0.95510
     98   3.28398  0.32475  4.86485  4.73479  4.65700  3.77697  5.27954  3.92092  4.58151  3.79456  4.94010  4.60205  4.51603  4.90666  4.60757  3.55278  3.79248  3.62199  5.92745  4.93249    142 C - - -
          2.68618  4.42225  2.77519  2.73123  3.46354  2.40513  3.72494  3.29354  2.67741  2.69355  4.24690  2.90347  2.73739  3.18146  2.89801  2.37887  2.77519  2.98518  4.58477  3.61503
          0.01907  4.36503  5.08738  0.61958  0.77255  0.48576  0.95510
     99   1.51626  4.32258  3.65583  3.09250  3.46718  3.21222  3.95101  2.67679  3.02908  2.53446  3.03059  3.45845  4.04245  3.32399  3.35196  2.91107  2.89707  2.50072  4.93696  3.17797    143 a - - -
          2.68618  4.42225  2.77519  2.73123  3.46354  2.40513  3.72494  3.29354  2.67741  2.69355  4.24690  2.90347  2.73739  3.18146  2.89801  2.37887  2.77519  2.98518  4.58477  3.61503
          0.01907  4.36503  5.08738  0.61958  0.77255  0.48576  0.95510
    100   2.36712  5.13369  2.65017  1.77061  4.03179  3.29055  3.63725  3.93050  2.23390  3.42972  4.18097  2.91574  3.83942  2.58592  2.63037  2.64148  2.80401  3.51355  5.57778  4.17852    144 e - - -
          2.68618  4.42225  2.77519  2.73123  3.46354  2.40513  3.72494  3.29354  2.67741  2.69355  4.24690  2.90347  2.73739  3.18146  2.89801  2.37887  2.77519  2.98518  4.58477  3.61503
          0.01907  4.36503  5.08738  0.61958  0.77255  0.48576  0.95510
    101   1.52492  4.39337  3.58144  3.03800  3.68724  3.52302  3.98914  2.68825  2.98828  2.73738  3.20019  3.40511  3.99741  3.29862  3.34227  2.19282  2.66734  2.71718  5.12671  3.89170    145 a - - -
          2.68618  4.42225  2.77519  2.73123  3.46354  2.40513  3.72494  3.29354  2.67741  2.69355  4.24690  2.90347  2.73739  3.18146  2.89801  2.37887  2.77519  2.98518  4.58477  3.61503
          0.01907  4.36503  5.08738  0.61958  0.77255  0.48576  0.95510
    102   3.28398  0.32475  4.86485  4.73479  4.65700  3.77697  5.27954  3.92092  4.58151  3.79456  4.94010  4.60205  4.51603  4.90666  4.60757  3.55278  3.79248  3.62199  5.92745  4.93249    146 C - - -
          2.68618  4.42225  2.77519  2.73123  3.46354  2.40513  3.72494  3.29354  2.67741  2.69355  4.24690  2.90347  2.73739  3.18146  2.89801  2.37887  2.77519  2.98518  4.58477  3.61503
          0.01907  4.36503  5.08738  0.61958  0.77255  0.48576  0.95510
    103   2.19067  5.07251  2.99314  2.13812  4.37850  3.48058  3.44687  3.82440  2.28693  2.88841  4.12779  2.80437  3.87234  2.64541  2.13789  2.68703  2.92718  3.44290  5.52057  4.15569    147 r - - -
          2.68618  4.42225  2.77519  2.73123  3.46354  2.40513  3.72494  3.29354  2.67741  2.69355  4.24690  2.90347  2.73739  3.18146  2.89801  2.37887  2.77519  2.98518  4.58477  3.61503
          0.01907  4.36503  5.08738  0.61958  0.77255  0.48576  0.95510
    104   1.91927  5.09107  2.90295  2.29963  4.40493  3.30585  3.68317  3.84801  2.39480  3.37836  4.16148  2.97964  3.89203  2.45569  2.03335  2.71893  2.96312  3.46918  5.54865  4.18683    148 a - - -
          2.68618  4.42225  2.77519  2.73123  3.46354  2.40513  3.72494  3.29354  2.67741  2.69355  4.24690  2.90347  2.73739  3.18146  2.89801  2.37887  2.77519  2.98518  4.58477  3.61503
          0.01907  4.36503  5.08738  0.61958  0.77255  0.48576  0.95510
    105   3.28398  0.32475  4.86485  4.73479  4.65700  3.77697  5.27954  3.92092  4.58151  3.79456  4.94010  4.60205  4.51603  4.90666  4.60757  3.55278  3.79248  3.62199  5.92745  4.93249    149 C - - -
          2.68618  4.42225  2.77519  2.73123  3.46354  2.40513  3.72494  3.29354  2.67741  2.69355  4.24690  2.90347  2.73739  3.18146  2.89801  2.37887  2.77519  2.98518  4.58477  3.61503
          0.01907  4.36503  5.08738  0.61958  0.77255  0.48576  0.95510
    106   1.68151  4.39007  3.51474  2.94758  3.53104  3.62861  3.88110  2.62636  2.57685  2.43814  3.32233  3.35790  4.00961  3.20452  3.24592  2.80473  2.78949  2.65214  4.97323  3.23840    150 a - - -
          2.68618  4.42225  2.77519  2.73123  3.46354  2.40513  3.72494  3.29354  2.67741  2.69355  4.24690  2.90347  2.73739  3.18146  2.89801  2.37887  2.77519  2.98518  4.58477  3.61503
          0.01907  4.36503  5.08738  0.61958  0.77255  0.48576  0.95510
    107   2.45500  5.14881  2.58822  1.97623  4.47927  3.43940  3.63484  3.95504  1.91756  3.29584  3.90933  2.80457  3.83822  2.54439  2.86468  2.51342  2.90426  3.53181  5.58893  4.18652    151 k - - -
          2.68618  4.42225  2.77519  2.73123  3.46354  2.40513  3.72494  3.29354  2.67741  2.69355  4.24690  2.90347  2.73739  3.18146  2.89801  2.37887  2.77519  2.98518  4.58477  3.61503
          0.01907  4.36503  5.08738  0.61958  0.77255  0.48576  0.95510
    108   2.01020  4.90894  3.02114  1.88865  4.16413  3.48117  3.50542  3.58650  2.42643  3.00899  3.58564  3.00466  3.87799  2.83281  2.93694  2.38827  2.90312  3.25120  5.40617  4.06282    152 e - - -
          2.68618  4.42225  2.77519  2.73123  3.46354  2.40513  3.72494  3.29354  2.67741  2.69355  4.24690  2.90347  2.73739  3.18146  2.89801  2.37887  2.77519  2.98518  4.58477  3.61503
          0.01907  4.36503  5.08738  0.61958  0.77255  0.48576  0.95510
    109   3.28398  0.32475  4.86485  4.73479  4.65700  3.77697  5.27954  3.92092  4.58151  3.79456  4.94010  4.60205  4.51603  4.90666  4.60757  3.55278  3.79248  3.62199  5.92745  4.93249    153 C - - -
          2.68618  4.42225  2.77519  2.73123  3.46354  2.40513  3.72494  3.29354  2.67741  2.69355  4.24690  2.90347  2.73739  3.18146  2.89801  2.37887  2.77519  2.98518  4.58477  3.61503
          0.01907  4.36503  5.08738  0.61958  0.77255  0.48576  0.95510
    110   2.73857  5.10688  3.04547  2.08044  4.42889  3.51090  3.66150  3.86848  1.96598  2.81702  3.90913  2.82262  3.89755  2.77659  2.00599  2.65168  2.96078  3.48672  5.53542  4.18537    154 k - - -
          2.68618  4.42225  2.77519  2.73123  3.46354  2.40513  3.72494  3.29354  2.67741  2.69355  4.24690  2.90347  2.73739  3.18146  2.89801  2.37887  2.77519  2.98518  4.58477  3.61503
          0.01907  4.36503  5.08738  0.61958  0.77255  0.48576  0.95510
    111   2.17332  5.13804  2.76819  2.22430  4.46624  3.45266  3.63992  3.93431  1.89156  3.28574  4.18590  2.92842  3.84911  2.43332  2.59735  2.56220  2.91405  3.52015  5.57663  4.18483    155 k - - -
          2.68618  4.42225  2.77519  2.73123  3.46354  2.40513  3.72494  3.29354  2.67741  2.69355  4.24690  2.90347  2.73739  3.18146  2.89801  2.37887  2.77519  2.98518  4.58477  3.61503
          0.01907  4.36503  5.08738  0.61958  0.77255  0.48576  0.95510
    112   3.27591  4.60058  5.03061  4.44589  2.71712  4.52525  4.83528  2.22127  4.30587  1.44864  1.47814  4.60718  4.75039  4.37436  4.36832  3.85811  3.49719  1.92216  5.16747  4.08161    156 l - - -
          2.68618  4.42225  2.77519  2.73123  3.46354  2.40513  3.72494  3.29354  2.67741  2.69355  4.24690  2.90347  2.73739  3.18146  2.89801  2.37887  2.77519  2.98518  4.58477  3.61503
          0.01907  4.36503  5.08738  0.61958  0.77255  0.48576  0.95510
    113   1.52671  4.43638  3.47460  2.92926  3.71468  3.12345  3.92378  2.96078  2.89039  2.67608  3.65811  3.32818  3.96869  3.09735  3.26512  2.56744  2.65453  2.46800  5.12977  3.88412    157 a - - -
          2.68618  4.42225  2.77519  2.73123  3.46354  2.40513  3.72494  3.29354  2.67741  2.69355  4.24690  2.90347  2.73739  3.18146  2.89801  2.37887  2.77519  2.98518  4.58477  3.61503
          0.04459  4.36503  3.47697  0.61958  0.77255  0.48576  0.95510
    114   1.86610  4.77895  3.09517  2.48681  4.05286  2.38961  3.58021  3.46067  2.54569  3.08147  3.66050  3.06170  3.89031  2.90088  2.82277  2.47712  2.83614  3.14415  5.34091  4.02376    158 a - - -
          2.68477  4.42268  2.77533  2.73152  3.46382  2.40523  3.72522  3.29397  2.67770  2.69329  4.24707  2.90373  2.73739  3.18062  2.89817  2.37895  2.77530  2.98534  4.58520  3.61512
          0.35298  1.21264        *  1.80481  0.17973  0.00000        *
//
