# Supplementary material for: Relationships Between Copper-Related Proteomes and Lifestyles in β Proteobacteria
Source: Front Microbiol. 2019 Sep 24;10:2217. doi: 10.3389/fmicb.2019.02217 (PMC6769254; doi:10.3389/fmicb.2019.02217)
Supplement: TABLE S1 — β proteobacterial species analyzed in this study. The species are sorted according to phylogenetic analyses, and the references used to determine their lifestyles are indicated along with the links to the corresponding publications. The different lifestyles are represented by colors: dark green for environmental species (E), green for opportunist/environmental species (OE), red for animal pathogens (AP), yellow for phytopathogens (PP), light beige for commensal species (C), orange for opportunist/commensal species (OC), beige for symbionts (S), light green for endophytes (EnP) and pink for endosymbionts (EnS). The sizes of the predicted proteomes are also provided. [file Table_1.XLSX]

## Sheet: Feuil1
		Supplementary Table 1. List of the 119 ß proteobacterial species analyzed in this study. The species are sorted according to phylogenetic analyses, and the references used to determine their lifestyles are indicated along with the links to the corresponding publications. The different lifestyles are represented by colors : dark green for environmental species (E), green for opportunist / environm…
			Species	Proteome size	Lifestyles	References	Links
		Burkholderiales	Achromobacter xylosoxidans A8	6747	OE	Barragán, Edgar Pérez, Justo Sandino Pérez, Laura Corbella, María Ángeles Orellana, et Mario Fernández-Ruiz. « Achromobacter xylosoxidans bacteremia: clinical and microbiological features in a 10-year case series ». Revista Española de Quimioterapia 31, no 3 (juin 2018): 268‑73.	https://www.ncbi.nlm.nih.gov/pmc/articles/PMC6166261/
			Advenella mimigardefordensis DPN7	4276	E	Wübbeler, Jan Hendrik, Sebastian Hiessl, Jörg Schuldes, Andrea Thürmer, Rolf Daniel, et Alexander Steinbüchel. « Unravelling the Complete Genome Sequence of Advenella Mimigardefordensis Strain DPN7T and Novel Insights in the Catabolism of the Xenobiotic Polythioester Precursor 3,3’-Dithiodipropionate ». Microbiology (Reading, England) 160, no Pt 7 (juillet 2014): 1401‑16.	https://www.ncbi.nlm.nih.gov/pubmed/24739217
			Alcaligenes faecalis ZD02	3785	OE	Arun Agarwal et al., « First Reported Case of Alcaligenes Faecalis Isolated from Bronchoalveolar Lavage in a Patient with Dengue Hemorrhagic Fever », The Journal of Association of Chest Physicians 5, no 1 (2017): 51, https://doi.org/10.4103/2320-8775.177512.	http://www.jacpjournal.org/article.asp?issn=2320-8775;year=2017;volume=5;issue=1;spage=51;epage=55;aulast=Agarwal
			Basilea psittacipulmonis DSM 24701	1637	S		https://gold.jgi.doe.gov/organism?id=Go0017856
			Bordetella avium 197N	3317	AP	Harrington, Amanda T., Jaime A. Castellanos, Tomasz M. Ziedalski, Jill E. Clarridge, et Brad T. Cookson. « Isolation of Bordetella avium and Novel Bordetella Strain from Patients with Respiratory Disease ». Emerging Infectious Diseases 15, no 1 (janvier 2009): 72‑74. https://doi.org/10.3201/eid1501.071677.	https://www.ncbi.nlm.nih.gov/pmc/articles/PMC2660683/
			Bordetella bronchialis strain AU3182	5084	OE	Peter A. Vandamme et al., « Bordetella Bronchialis Sp. Nov., Bordetella Flabilis Sp. Nov. and Bordetella Sputigena Sp. Nov., Isolated from Human Respiratory Specimens, and Reclassification of Achromobacter Sediminum Zhang et Al. 2014 as Verticia Sediminum Gen. Nov., Comb. Nov », International Journal of Systematic and Evolutionary Microbiology 65, no 10 (octobre 2015): 3674‑82, https://doi.org/10…	https://www.ncbi.nlm.nih.gov/pubmed/26220296
			Bordetella bronchiseptica strain RB50	4993	AP	Goodnow, R A. « Biology of Bordetella bronchiseptica. » Microbiological Reviews 44, no 4 (décembre 1980): 722‑38.	https://www.ncbi.nlm.nih.gov/pmc/articles/PMC373201/?page=1
			Bordetella flabilis strain AU10664	5238	OE	Peter A. Vandamme et al., « Bordetella Bronchialis Sp. Nov., Bordetella Flabilis Sp. Nov. and Bordetella Sputigena Sp. Nov., Isolated from Human Respiratory Specimens, and Reclassification of Achromobacter Sediminum Zhang et Al. 2014 as Verticia Sediminum Gen. Nov., Comb. Nov », International Journal of Systematic and Evolutionary Microbiology 65, no 10 (octobre 2015): 3674‑82, https://doi.org/10…	https://www.ncbi.nlm.nih.gov/pubmed/26220296
			Bordetella hinzii strain F582	4502	AP	Register, Karen B., et Robert A. Kunkle. « Strain-Specific Virulence of Bordetella Hinzii in Poultry ». Avian Diseases 53, no 1 (mars 2009): 50‑54. https://doi.org/10.1637/8388-070108-Reg.1.	https://www.ncbi.nlm.nih.gov/pubmed/19432003
			Bordetella holmesii ATCC 51541	3004	AP	Shepard, Colin W., Maryam I. Daneshvar, Robyn M. Kaiser, David A. Ashford, David Lonsway, Jean B. Patel, Roger E. Morey, Jean G. Jordan, Robbin S. Weyant, et Marc Fischer. « Bordetella Holmesii Bacteremia: A Newly Recognized Clinical Entity among Asplenic Patients ». Clinical Infectious Diseases: An Official Publication of the Infectious Diseases Society of America 38, no 6 (15 mars 2004): 799‑80…	https://www.ncbi.nlm.nih.gov/pubmed/14999621
			Bordetella parapertussis strain 12822	4168	AP	Mastrantonio, Paola, P. Stefanelli, M. Giuliano, Y. Herrera Rojas, M. Ciofi degli Atti, A. Anemona, et A. E. Tozzi. « Bordetella parapertussis Infection in Children: Epidemiology, Clinical Symptoms, and Molecular Characteristics of Isolates ». Journal of Clinical Microbiology 36, no 4 (avril 1998): 999‑1002.	https://www.ncbi.nlm.nih.gov/pmc/articles/PMC104677/
			Bordetella pertussis Tohama I	3425	AP	Jeffrey A. Melvin et al., « Bordetella Pertussis Pathogenesis: Current and Future Challenges », Nature Reviews. Microbiology 12, no 4 (avril 2014): 274‑88, https://doi.org/10.1038/nrmicro3235.	https://www.ncbi.nlm.nih.gov/pubmed/24608338
			Bordetella petrii strain DSM 12804	4912	OE	Zelazny, Adrian M., Li Ding, Joanna B. Goldberg, Lilia A. Mijares, Sean Conlan, Patricia S. Conville, Frida Stock, et al. « Adaptability and Persistence of the Emerging Pathogen Bordetella Petrii ». PloS One 8, no 6 (2013): e65102. https://doi.org/10.1371/journal.pone.0065102.	https://www.ncbi.nlm.nih.gov/pubmed/23750235
			Bordetella pseudohinzii strain HI4681	4147	AP	Perniss, Alexander, Nadine Schmidt, Corinne Gurtner, Kristina Dietert, Oliver Schwengers, Markus Weigel, Julia Hempe, et al. « Bordetella Pseudohinzii Targets Cilia and Impairs Tracheal Cilia-Driven Transport in Naturally Acquired Infection in Mice ». Scientific Reports 8, no 1 (9 avril 2018): 5681. https://doi.org/10.1038/s41598-018-23830-4.	https://www.ncbi.nlm.nih.gov/pubmed/29632402
			Bordetella trematum strain H044680328	3985	OE	Vandamme, P., M. Heyndrickx, M. Vancanneyt, B. Hoste, P. De Vos, E. Falsen, K. Kersters, et K. H. Hinz. « Bordetella Trematum Sp. Nov., Isolated from Wounds and Ear Infections in Humans, and Reassessment of Alcaligenes Denitrificans Rüger and Tan 1983 ». International Journal of Systematic Bacteriology 46, no 4 (octobre 1996): 849‑58. https://doi.org/10.1099/00207713-46-4-849.	https://www.ncbi.nlm.nih.gov/pubmed/8863408
			Bordetella sp. H567	4864	AP	Weigand, Michael R., Yanhui Peng, Vladimir Loparev, Dhwani Batra, Katherine E. Bowden, Pamela K. Cassiday, Jamie K. Davis, et al. « Complete Genome Sequences of Four Different Bordetella sp. Isolates Causing Human Respiratory Infections ». Genome Announcements 4, no 5 (6 octobre 2016). https://doi.org/10.1128/genomeA.01080-16.	https://www.ncbi.nlm.nih.gov/pmc/articles/PMC5054321/
			Bordetella sp. HZ20	3581	E	Sun, Cong, Lin Xu, Jun-Jie Ying, Shun-Li Zhang, Chao-Yu Huang, Yue-Hong Wu, Xin-Qi Zhang, Min Wu, et Xue-Wei Xu. « Complete genome sequence of Bordetella sp. HZ20 sheds light on the ecological role of bacterium without algal-polysaccharides degrading abilities in the brown seaweed-abundant environment ». Marine Genomics 42 (1 décembre 2018): 49‑52. https://doi.org/10.1016/j.margen.2018.06.002.	https://www.sciencedirect.com/science/article/pii/S1874778718300898
			Bordetella sp. J329	3377	AP		https://www.ncbi.nlm.nih.gov/biosample/SAMN06350661
			Bordetella sp. N	5955	E		https://gold.jgi.doe.gov/organism?id=Go0139612
			Castellaniella defragrans 65Phen	3428	E	Kämpfer, P., K. Denger, A. M. Cook, S.-T. Lee, U. Jäckel, E. B. M. Denner, et H.-J. Busse. « Castellaniella Gen. Nov., to Accommodate the Phylogenetic Lineage of Alcaligenes Defragrans, and Proposal of Castellaniella Defragrans Gen. Nov., Comb. Nov. and Castellaniella Denitrificans Sp. Nov ». International Journal of Systematic and Evolutionary Microbiology 56, no Pt 4 (avril 2006): 815‑19. https…	https://www.ncbi.nlm.nih.gov/pubmed/16585701
			Oligella urethralis strain FDAARGOS_329	2239	OC	Amanda Wilmer et al., « Oligella Urethralis as a Cause of Urosepsis », Clinical Microbiology Newsletter 35, no 10 (mai 2013): 84‑85, https://doi.org/10.1016/j.clinmicnews.2013.04.003.	https://www.deepdyve.com/lp/elsevier/oligella-urethralis-as-a-cause-of-urosepsis-o9XCKJ7zw3
			Orrella dioscoreae LMG 29303	4333	EnP	Everlon Rigobelo, Symbiosis (BoD – Books on Demand, 2018).	https://books.google.fr/books?id=AjGQDwAAQBAJ&pg=PA96&lpg=PA96&dq#v=onepage&q&f=false
			Paenalcaligenes hominis strain 15S00501	2115	OC	Rituparna Mukhopadhyay et al., « Complete Genome Sequence of a Paenalcaligenes hominis Strain Isolated from a Paraplegic Patient with Neurogenic Bladder Using Single-Molecule Real-Time Sequencing Technology », Genome Announcements 5, no 17 (27 avril 2017), https://doi.org/10.1128/genomeA.00252-17.	https://www.ncbi.nlm.nih.gov/pmc/articles/PMC5408116/
			Taylorella equigenitalis ATCC 35865	1536	AP	Brian W. Brooks et al., « Identification and differentiation of Taylorella equigenitalis and Taylorella asinigenitalis by lipopolysaccharide O-antigen serology using monoclonal antibodies », Canadian Journal of Veterinary Research 74, no 1 (janvier 2010): 18‑24.	https://www.ncbi.nlm.nih.gov/pmc/articles/PMC2801306/
			Burkholderia ambifaria MC40-6	6575	OE	Annelise Chapalain et al., « Identification of quorum sensing-controlled genes in Burkholderia ambifaria », MicrobiologyOpen 2, no 2 (avril 2013): 226‑42, https://doi.org/10.1002/mbo3.67.	https://www.ncbi.nlm.nih.gov/pmc/articles/PMC3633348/
			Burkholderia cenocepacia J2315	7317	OE	Eshwar Mahenthiralingam, Teresa A. Urban, et Joanna B. Goldberg, « The Multifarious, Multireplicon Burkholderia Cepacia Complex », Nature Reviews. Microbiology 3, no 2 (février 2005): 144‑56, https://doi.org/10.1038/nrmicro1085.	https://www.ncbi.nlm.nih.gov/pubmed/15643431
			Burkholderia cepacia ATCC 25416	7614	OE	Eshwar Mahenthiralingam, Teresa A. Urban, et Joanna B. Goldberg, « The Multifarious, Multireplicon Burkholderia Cepacia Complex », Nature Reviews. Microbiology 3, no 2 (février 2005): 144‑56, https://doi.org/10.1038/nrmicro1085.	https://www.ncbi.nlm.nih.gov/pubmed/15643431
			Burkholderia gladioli ATCC10248	7386	PP	M. Graves et al., « Four Additional Cases of Burkholderia Gladioli Infection with Microbiological Correlates and Review », Clinical Infectious Diseases: An Official Publication of the Infectious Diseases Society of America 25, no 4 (octobre 1997): 838‑42, https://doi.org/10.1086/515551.	https://www.ncbi.nlm.nih.gov/pubmed/9356798
			Burkholderia glumae BGR1	6151	PP	Cui Zhou-qi et al., « Research Status and Prospect of Burkholderia glumae, the Pathogen Causing Bacterial Panicle Blight », Rice Science 23, no 3 (1 mai 2016): 111‑18, https://doi.org/10.1016/j.rsci.2016.01.007.	https://www.sciencedirect.com/science/article/pii/S1672630816300014
			Burkholderia mallei ATCC23344	5022	AP	Gregory C. Whitlock, D. Mark Estes, et Alfredo G. Torres, « Glanders: Off to the Races with Burkholderia Mallei », FEMS Microbiology Letters 277, no 2 (décembre 2007): 115‑22, https://doi.org/10.1111/j.1574-6968.2007.00949.x.	https://www.ncbi.nlm.nih.gov/pubmed/18031330
			Burkholderia metallica FL-6-5-30-S1-D7	6491	OE	Elke Vanlaere et al., « Burkholderia Latens Sp. Nov., Burkholderia Diffusa Sp. Nov., Burkholderia Arboris Sp. Nov., Burkholderia Seminalis Sp. Nov. and Burkholderia Metallica Sp. Nov., Novel Species within the Burkholderia Cepacia Complex », International Journal of Systematic and Evolutionary Microbiology 58, no Pt 7 (juillet 2008): 1580‑90, https://doi.org/10.1099/ijs.0.65634-0.	https://www.ncbi.nlm.nih.gov/pubmed/18599699
			Burkholderia multivorans ATCC17616	6398	OE	Diego P. Peralta et al., « Burkholderia Multivorans: A Rare yet Emerging Cause of Bacterial Meningitis », IDCases 11 (2018): 61‑63, https://doi.org/10.1016/j.idcr.2018.01.002.	https://www.ncbi.nlm.nih.gov/pubmed/29619322
			Burkholderia plantarii PG1	6522	PP	Yuan Qian et al., « Genome Sequence of Burkholderia plantarii ZJ171, a Tropolone-Producing Bacterial Pathogen Responsible for Rice Seedling Blight », Genome Announcements 4, no 6 (8 décembre 2016), https://doi.org/10.1128/genomeA.01318-16.	https://www.ncbi.nlm.nih.gov/pmc/articles/PMC5146435/
			Burkholderia pseudomallei K96243	5726	AP	Tannistha Nandi et al., « A Genomic Survey of Positive Selection in Burkholderia Pseudomallei Provides Insights into the Evolution of Accidental Virulence », PLoS Pathogens 6, no 4 (1 avril 2010): e1000845, https://doi.org/10.1371/journal.ppat.1000845.	https://www.ncbi.nlm.nih.gov/pubmed/20368977
			Burkholderia territorii RF8-non-BP5	6055	E	Birgit De Smet et al., « Burkholderia Stagnalis Sp. Nov. and Burkholderia Territorii Sp. Nov., Two Novel Burkholderia Cepacia Complex Species from Environmental and Human Sources », International Journal of Systematic and Evolutionary Microbiology 65, no 7 (juillet 2015): 2265‑71, https://doi.org/10.1099/ijs.0.000251.	https://www.ncbi.nlm.nih.gov/pubmed/25872960
			Cupriavidus metallidurans CH34	6316	OE	Jocelyn Leonie Jardine et al., « Phylogenetic Analysis and Antimicrobial Profiles of Cultured Emerging Opportunistic Pathogens (Phyla Actinobacteria and Proteobacteria) Identified in Hot Springs », International Journal of Environmental Research and Public Health 14, no 9 (septembre 2017), https://doi.org/10.3390/ijerph14091070.	https://www.ncbi.nlm.nih.gov/pmc/articles/PMC5615607/
			Hydromonas sp. F02	2438	C	Hyangmi Kim et al., « Ephemeroptericola Cinctiostellae Gen. Nov., Sp. Nov., Isolated from Gut of an Aquatic Insect », International Journal of Systematic and Evolutionary Microbiology, 1 avril 2019, https://doi.org/10.1099/ijsem.0.003296.	https://www.ncbi.nlm.nih.gov/pubmed/30932804
			Pandoraea pnomenusa strain DSM 16536	4659	OE	Mark Ambrose et al., « Pandoraea pnomenusa Isolated from an Australian Patient with Cystic Fibrosis », Frontiers in Microbiology 7 (11 mai 2016), https://doi.org/10.3389/fmicb.2016.00692.	https://www.ncbi.nlm.nih.gov/pmc/articles/PMC4863129/
			Paraburkholderia phytofirmans PsJN	7188	EnP	Qassim Esmaeel et al., « Paraburkholderia phytofirmans PsJN-Plants Interaction: From Perception to the Induced Mechanisms », Frontiers in Microbiology 9 (30 août 2018), https://doi.org/10.3389/fmicb.2018.02093.	https://www.ncbi.nlm.nih.gov/pmc/articles/PMC6125355/
			Paucimonas lemoignei strain NCTC10937	5129	E	L.C. Reimer et al., « Paucimonas Lemoignei (Delafield et Al. 1965) Jendrossek 2001 » (DSMZ, 2 avril 2019), https://doi.org/10.13145/bacdive2067.20190402.4.	https://bacdive.dsmz.de/strain/2067
			Polynucleobacter necessarius STIR1	1328	EnS	Martin W. Hahn et al., « Reclassification of Four Polynucleobacter Necessarius Strains as Representatives of Polynucleobacter Asymbioticus Comb. Nov., Polynucleobacter Duraquae Sp. Nov., Polynucleobacter Yangtzensis Sp. Nov. and Polynucleobacter Sinensis Sp. Nov., and Emended Description of Polynucleobacter Necessarius », International Journal of Systematic and Evolutionary Microbiology 66, no 8 …	https://www.ncbi.nlm.nih.gov/pubmed/27064460
			Ralstonia solanacearum GMI1000	4984	PP	Zhong Wei et al., « Ralstonia solanacearum pathogen disrupts bacterial rhizosphere microbiome during an invasion », Soil Biology and Biochemistry 118 (1 mars 2018): 8‑17, https://doi.org/10.1016/j.soilbio.2017.11.012.	https://www.sciencedirect.com/science/article/abs/pii/S0038071717306557
			Acidovorax avenae subsp. avenae ATCC 19860	4678	PP	Guan-Lin Xie et al., « Genome Sequence of the Rice-Pathogenic Bacterium Acidovorax avenae subsp. avenae RS-1 ▿ », Journal of Bacteriology 193, no 18 (septembre 2011): 5013‑14, https://doi.org/10.1128/JB.05594-11.	https://www.ncbi.nlm.nih.gov/pmc/articles/PMC3165674/
			Alicycliphilus denitrificans K601	4682	E	Sander A. B. Weelink et al., « Isolation and Characterization of Alicycliphilus denitrificans Strain BC, Which Grows on Benzene with Chlorate as the Electron Acceptor », Applied and Environmental Microbiology 74, no 21 (novembre 2008): 6672‑81, https://doi.org/10.1128/AEM.00835-08.	https://www.ncbi.nlm.nih.gov/pmc/articles/PMC2576721/
			Candidatus Symbiobacter mobilis CR	2337	S	Zhenfeng Liu et al., « Genomic analysis reveals key aspects of prokaryotic symbiosis in the phototrophic consortium “Chlorochromatium aggregatum” », Genome Biology 14, no 11 (2013): R127, https://doi.org/10.1186/gb-2013-14-11-r127.	https://www.ncbi.nlm.nih.gov/pmc/articles/PMC4053972/
			Comamonas testosteroni TK102	5295	OE	Gülsüm İclal Bayhan et al., « Comamonas testosteroni: An Unusual Bacteria Associated with Acute Appendicitis », Balkan medical journal 30, no 4 (décembre 2013): 447‑48, https://doi.org/10.5152/balkanmedj.2013.9135.	https://www.ncbi.nlm.nih.gov/pmc/articles/PMC4115943/
			Delftia acidovorans SPH-1	6052	OE	Huseyin Bilgin et al., « Delftia acidovorans: A rare pathogen in immunocompetent and immunocompromised patients », The Canadian Journal of Infectious Diseases & Medical Microbiology 26, no 5 (2015): 277‑79.	https://www.ncbi.nlm.nih.gov/pmc/articles/PMC4644013/
			Diaphorobacter polyhydroxybutyrativorans SL-205	3639	E	Tianlei Qiu et al., « Diaphorobacter Polyhydroxybutyrativorans Sp. Nov., a Novel Poly(3-Hydroxybutyrate-Co-3-Hydroxyvalerate)-Degrading Bacterium Isolated from Biofilms », International Journal of Systematic and Evolutionary Microbiology 65, no 9 (septembre 2015): 2913‑18, https://doi.org/10.1099/ijs.0.000353.	https://www.ncbi.nlm.nih.gov/pubmed/26012582
			Hydrogenophaga crassostreae LPB0072	4500	E	Chaeyun Baek et al., « Hydrogenophaga Crassostreae Sp. Nov., Isolated from a Pacific Oyster », International Journal of Systematic and Evolutionary Microbiology 67, no 10 (octobre 2017): 4045‑49, https://doi.org/10.1099/ijsem.0.002244.	https://www.ncbi.nlm.nih.gov/pubmed/28901906
			Limnohabitans sp. 63ED37-2	3152	E	Vojtěch Kasalický et al., « Aerobic Anoxygenic Photosynthesis Is Commonly Present within the Genus Limnohabitans », Applied and Environmental Microbiology 84, no 1 (1 janvier 2018), https://doi.org/10.1128/AEM.02116-17.	https://www.ncbi.nlm.nih.gov/pubmed/29030444
			Melaminivora sp. SC2-9.gb	3401	E		https://gold.jgi.doe.gov/organism?id=Go0452032
			Ottowia oryzae strain KADR8-3	3437	E	Jun Heo et al., « Ottowia Oryzae Sp. Nov., Isolated from Andong Sikhye, a Korean Traditional Rice Beverage », International Journal of Systematic and Evolutionary Microbiology 68, no 10 (octobre 2018): 3096‑3100, https://doi.org/10.1099/ijsem.0.002935.	https://www.ncbi.nlm.nih.gov/pubmed/30102146
			Polaromonas naphthalenivorans CJ2	4879	E	Che Ok Jeon et al., « Polaromonas Naphthalenivorans Sp. Nov., a Naphthalene-Degrading Bacterium from Naphthalene-Contaminated Sediment », International Journal of Systematic and Evolutionary Microbiology 54, no Pt 1 (janvier 2004): 93‑97, https://doi.org/10.1099/ijs.0.02636-0.	https://www.ncbi.nlm.nih.gov/pubmed/14742464
			Ramlibacter tataouinensis TTB310	3845	E	Gilles De Luca et al., « The Cyst-Dividing Bacterium Ramlibacter tataouinensis TTB310 Genome Reveals a Well-Stocked Toolbox for Adaptation to a Desert Environment », PLoS ONE 6, no 9 (1 septembre 2011), https://doi.org/10.1371/journal.pone.0023784.	https://www.ncbi.nlm.nih.gov/pmc/articles/PMC3164672/
			Rhodoferax ferrireducens T118	4479	E	Kevin T. Finneran, Claudia V. Johnsen, et Derek R. Lovley, « Rhodoferax Ferrireducens Sp. Nov., a Psychrotolerant, Facultatively Anaerobic Bacterium That Oxidizes Acetate with the Reduction of Fe(III) », International Journal of Systematic and Evolutionary Microbiology 53, no Pt 3 (mai 2003): 669‑73, https://doi.org/10.1099/ijs.0.02298-0.	https://www.ncbi.nlm.nih.gov/pubmed/12807184
			Simplicispira suum strain SC1-8	3693	E	Ha-Young Cho et al., « Simplicispira Suum Sp. Nov., Isolated from a Dust Collector at a Pig Farm », International Journal of Systematic and Evolutionary Microbiology 68, no 8 (août 2018): 2557‑61, https://doi.org/10.1099/ijsem.0.002874.	https://www.ncbi.nlm.nih.gov/pubmed/29939126
			Variovorax paradoxus B4	6565	E	Jong-In Han et al., « Complete Genome Sequence of the Metabolically Versatile Plant Growth-Promoting Endophyte Variovorax paradoxus S110 », Journal of Bacteriology 193, no 5 (mars 2011): 1183‑90, https://doi.org/10.1128/JB.00925-10.	https://www.ncbi.nlm.nih.gov/pmc/articles/PMC3067606/
			Verminephrobacter eiseniae EF01-2	4757	S	Seana K. Davidson et al., « Earthworm symbiont Verminephrobacter eiseniae mediates natural transformation within host egg capsules using type IV pili », Frontiers in Microbiology 5 (29 octobre 2014), https://doi.org/10.3389/fmicb.2014.00546.	https://www.ncbi.nlm.nih.gov/pmc/articles/PMC4212676/
			Candidatus Zinderia insecticola CARI	206	EnS	John P. McCutcheon et Nancy A. Moran, « Functional Convergence in Reduced Genomes of Bacterial Symbionts Spanning 200 My of Evolution », Genome Biology and Evolution 2 (2010): 708‑18, https://doi.org/10.1093/gbe/evq055.	https://www.ncbi.nlm.nih.gov/pmc/articles/PMC2953269/
			Collimonas fungivorans Ter331	4550	E	Wietse de Boer et al., « Collimonas Fungivorans Gen. Nov., Sp. Nov., a Chitinolytic Soil Bacterium with the Ability to Grow on Living Fungal Hyphae », International Journal of Systematic and Evolutionary Microbiology 54, no Pt 3 (mai 2004): 857‑64, https://doi.org/10.1099/ijs.0.02920-0.	https://www.ncbi.nlm.nih.gov/pubmed/15143036
			Herbaspirillum seropedicae SmR1	4711	EnP	Fábio O. Pedrosa et al., « Genome of Herbaspirillum seropedicae Strain SmR1, a Specialized Diazotrophic Endophyte of Tropical Grasses », PLoS Genetics 7, no 5 (12 mai 2011), https://doi.org/10.1371/journal.pgen.1002064.	https://www.ncbi.nlm.nih.gov/pmc/articles/PMC3093359/
			Herminiimonas arsenicoxydans	3186	E	Daniel Muller et al., « Herminiimonas Arsenicoxydans Sp. Nov., a Metalloresistant Bacterium », International Journal of Systematic and Evolutionary Microbiology 56, no Pt 8 (août 2006): 1765‑69, https://doi.org/10.1099/ijs.0.64308-0.	https://www.ncbi.nlm.nih.gov/pubmed/16902005
			Janthinobacterium svalbardensis PAMC 27463	5359	E	Yong-Joon Cho et al., « Complete Genome Sequence of a Psychrotolerant Denitrifying Bacterium, Janthinobacterium svalbardensis PAMC 27463 », Genome Announcements 5, no 46 (16 novembre 2017), https://doi.org/10.1128/genomeA.01178-17.	https://www.ncbi.nlm.nih.gov/pmc/articles/PMC5690324/
			Massilia violaceinigra strain B2	6222	E	Haisheng Wang et al., « Massilia Violaceinigra Sp. Nov., a Novel Purple-Pigmented Bacterium Isolated from Glacier Permafrost », International Journal of Systematic and Evolutionary Microbiology 68, no 7 (juillet 2018): 2271‑78, https://doi.org/10.1099/ijsem.0.002826.	https://www.ncbi.nlm.nih.gov/pubmed/29851375
			Oxalobacter formigenes strain HC-1	2232	C	Sylvia H. Duncan et al., « Oxalobacter formigenes and Its Potential Role in Human Health », Applied and Environmental Microbiology 68, no 8 (août 2002): 3841‑47, https://doi.org/10.1128/AEM.68.8.3841-3847.2002.	https://www.ncbi.nlm.nih.gov/pmc/articles/PMC124017/
			Leptothrix cholodnii SP-6	4300	E	Minoru Takeda et al., « Structural Analysis of the Sheath of a Sheathed Bacterium, Leptothrix Cholodnii », International Journal of Biological Macromolecules 37, no 1‑2 (30 octobre 2005): 92‑98, https://doi.org/10.1016/j.ijbiomac.2005.09.002.	https://www.ncbi.nlm.nih.gov/pubmed/16214212
			Methylibium petroleiphilum PM1	4452	E	Cindy H. Nakatsu et al., « Methylibium Petroleiphilum Gen. Nov., Sp. Nov., a Novel Methyl Tert-Butyl Ether-Degrading Methylotroph of the Betaproteobacteria », International Journal of Systematic and Evolutionary Microbiology 56, no Pt 5 (mai 2006): 983‑89, https://doi.org/10.1099/ijs.0.63524-0.	https://www.ncbi.nlm.nih.gov/pubmed/16627642
			Mitsuaria sp. 7	5232	E	Miao-Chun Fan et al., « Mitsuaria Noduli Sp. Nov., Isolated from the Root Nodules of Robinia Pseudoacacia in a Lead-Zinc Mine », International Journal of Systematic and Evolutionary Microbiology 68, no 1 (janvier 2018): 87‑92, https://doi.org/10.1099/ijsem.0.002459.	https://www.ncbi.nlm.nih.gov/pubmed/29095138
			Paucibacter sp. KCTC 42545	4296	E		https://gold.jgi.doe.gov/organism?id=Go0140655
			Rhizobacter gummiphilus NS21	5748	E	Shunsuke Imai et al., « Rhizobacter Gummiphilus Sp. Nov., a Rubber-Degrading Bacterium Isolated from the Soil of a Botanical Garden in Japan », The Journal of General and Applied Microbiology 59, no 3 (2013): 199‑205.	https://www.ncbi.nlm.nih.gov/pubmed/23863290
			Roseateles depolymerans KCTC 42856	4715	E	Sang-Heon Lee et al., « Complete Genome of Biodegradable Plastics-Decomposing Roseateles Depolymerans KCTC 42856(T) (=61A(T)) », Journal of Biotechnology 220 (20 février 2016): 47‑48, https://doi.org/10.1016/j.jbiotec.2016.01.012.	https://www.ncbi.nlm.nih.gov/pubmed/26784990
			Rubrivivax gelatinosus IL144	4533	E	Sakiko Nagashima et al., « Complete Genome Sequence of Phototrophic Betaproteobacterium Rubrivivax gelatinosus IL144 », Journal of Bacteriology 194, no 13 (juillet 2012): 3541‑42, https://doi.org/10.1128/JB.00511-12.	https://www.ncbi.nlm.nih.gov/pmc/articles/PMC3434721/
			Thiomonas intermedia strain ATCC 15466	3009	E	S. Wentzien et W. Sand, « Tetrathionate Disproportionation by Thiomonas Intermedia K12 », Engineering in Life Sciences 4, no 1 (2004): 25‑30, https://doi.org/10.1002/elsc.200400007.	https://onlinelibrary.wiley.com/doi/abs/10.1002/elsc.200400007
		Neisseriales	Aquitalea magnusonii H3	4407	E	Hoi-Ting Lau, John Faryna, et Eric W. Triplett, « Aquitalea Magnusonii Gen. Nov., Sp. Nov., a Novel Gram-Negative Bacterium Isolated from a Humic Lake », International Journal of Systematic and Evolutionary Microbiology 56, no Pt 4 (avril 2006): 867‑71, https://doi.org/10.1099/ijs.0.64089-0.	https://www.ncbi.nlm.nih.gov/pubmed/16585708
			Chromobacterium violaceum ATCC 12472	4245	OE	M Ravish Kumar, « Chromobacterium violaceum: A rare bacterium isolated from a wound over the scalp », International Journal of Applied and Basic Medical Research 2, no 1 (2012): 70‑72, https://doi.org/10.4103/2229-516X.96814.	https://www.ncbi.nlm.nih.gov/pmc/articles/PMC3657989/
			Laribacter hongkongensis HLHK9	2835	OE	Jade L. L. Teng et al., « Ecoepidemiology of Laribacter Hongkongensis, a Novel Bacterium Associated with Gastroenteritis », Journal of Clinical Microbiology 43, no 2 (février 2005): 919‑22, https://doi.org/10.1128/JCM.43.2.919-922.2005.	https://www.ncbi.nlm.nih.gov/pubmed/15695706
			Pseudogulbenkiania sp. NH8B	3916	E	Satoshi Ishii et al., « Complete Genome Sequence of the Denitrifying and N2O-Reducing Bacterium Pseudogulbenkiania sp. Strain NH8B », Journal of Bacteriology 193, no 22 (novembre 2011): 6395‑96, https://doi.org/10.1128/JB.06127-11.	https://www.ncbi.nlm.nih.gov/pmc/articles/PMC3209224/
			Crenobacter sp. K1W11S-77	2980	E	Lei Dong et al., « Crenobacter Luteus Gen. Nov., Sp. Nov., Isolated from a Hot Spring », International Journal of Systematic and Evolutionary Microbiology 65, no Pt 1 (janvier 2015): 214‑19, https://doi.org/10.1099/ijs.0.060996-0.	https://www.ncbi.nlm.nih.gov/pubmed/25332210
			Eikenella corrodens strain NCTC10596	2063	OC	C. K. Chen et M. E. Wilson, « Eikenella Corrodens in Human Oral and Non-Oral Infections: A Review », Journal of Periodontology 63, no 12 (décembre 1992): 941‑53, https://doi.org/10.1902/jop.1992.63.12.941.	https://www.ncbi.nlm.nih.gov/pubmed/1474466
			Kingella kingae strain NCTC10529	1948	OC	Pablo Yagupsky, « Kingella Kingae: From Medical Rarity to an Emerging Paediatric Pathogen », The Lancet. Infectious Diseases 4, no 6 (juin 2004): 358‑67, https://doi.org/10.1016/S1473-3099(04)01046-1.	https://www.ncbi.nlm.nih.gov/pubmed/15172344
			Neisseria animalis NCTC10212	1947	C	Guangyu Liu, Christoph M. Tang, et Rachel M. Exley, « Non-Pathogenic Neisseria: Members of an Abundant, Multi-Habitat, Diverse Genus », Microbiology (Reading, England) 161, no 7 (juillet 2015): 1297‑1312, https://doi.org/10.1099/mic.0.000086.	https://www.ncbi.nlm.nih.gov/pubmed/25814039
			Neisseria animaloris NCTC12228	2084	OC	Guangyu Liu, Christoph M. Tang, et Rachel M. Exley, « Non-Pathogenic Neisseria: Members of an Abundant, Multi-Habitat, Diverse Genus », Microbiology (Reading, England) 161, no 7 (juillet 2015): 1297‑1312, https://doi.org/10.1099/mic.0.000086.	https://www.ncbi.nlm.nih.gov/pubmed/25814039
			Neisseria canis NCTC10296	2275	OC	Guangyu Liu, Christoph M. Tang, et Rachel M. Exley, « Non-Pathogenic Neisseria: Members of an Abundant, Multi-Habitat, Diverse Genus », Microbiology (Reading, England) 161, no 7 (juillet 2015): 1297‑1312, https://doi.org/10.1099/mic.0.000086.	https://www.ncbi.nlm.nih.gov/pubmed/25814039
			Neisseria gonorrhoeae FA 1090	1886	AP	Sarah Jane Quillin et H. Steven Seifert, « Neisseria Gonorrhoeae Host Adaptation and Pathogenesis », Nature Reviews. Microbiology 16, no 4 (avril 2018): 226‑40, https://doi.org/10.1038/nrmicro.2017.169.	https://www.ncbi.nlm.nih.gov/pubmed/29430011
			Neisseria lactamica 020-06	2085	OC	Guangyu Liu, Christoph M. Tang, et Rachel M. Exley, « Non-Pathogenic Neisseria: Members of an Abundant, Multi-Habitat, Diverse Genus », Microbiology (Reading, England) 161, no 7 (juillet 2015): 1297‑1312, https://doi.org/10.1099/mic.0.000086.	https://www.ncbi.nlm.nih.gov/pubmed/25814039
			Neisseria meningitidis MC58	1943	AP	Marco Soriani, « Unraveling Neisseria meningitidis pathogenesis: from functional genomics to experimental models », F1000Research 6 (26 juillet 2017), https://doi.org/10.12688/f1000research.11279.1.	https://www.ncbi.nlm.nih.gov/pmc/articles/PMC5531161/
			Neisseria mucosa ATCC19696	2388	OC	Guangyu Liu, Christoph M. Tang, et Rachel M. Exley, « Non-Pathogenic Neisseria: Members of an Abundant, Multi-Habitat, Diverse Genus », Microbiology (Reading, England) 161, no 7 (juillet 2015): 1297‑1312, https://doi.org/10.1099/mic.0.000086.	https://www.ncbi.nlm.nih.gov/pubmed/25814039
			Neisseria sicca FDAARGOS_260	2445	OC	Guangyu Liu, Christoph M. Tang, et Rachel M. Exley, « Non-Pathogenic Neisseria: Members of an Abundant, Multi-Habitat, Diverse Genus », Microbiology (Reading, England) 161, no 7 (juillet 2015): 1297‑1312, https://doi.org/10.1099/mic.0.000086.	https://www.ncbi.nlm.nih.gov/pubmed/25814039
			Neisseria subflava M18660	2098	OC	Guangyu Liu, Christoph M. Tang, et Rachel M. Exley, « Non-Pathogenic Neisseria: Members of an Abundant, Multi-Habitat, Diverse Genus », Microbiology (Reading, England) 161, no 7 (juillet 2015): 1297‑1312, https://doi.org/10.1099/mic.0.000086.	https://www.ncbi.nlm.nih.gov/pubmed/25814039
			Neisseria weaveri NCTC13585	1970	OC	Guangyu Liu, Christoph M. Tang, et Rachel M. Exley, « Non-Pathogenic Neisseria: Members of an Abundant, Multi-Habitat, Diverse Genus », Microbiology (Reading, England) 161, no 7 (juillet 2015): 1297‑1312, https://doi.org/10.1099/mic.0.000086.	https://www.ncbi.nlm.nih.gov/pubmed/25814039
			Simonsiella muelleri ATCC 29453	2286	C	Brian P. Hedlund et James T. Staley, « Phylogeny of the Genus Simonsiella and Other Members of the Neisseriaceae », International Journal of Systematic and Evolutionary Microbiology 52, no Pt 4 (juillet 2002): 1377‑82, https://doi.org/10.1099/00207713-52-4-1377.	https://www.ncbi.nlm.nih.gov/pubmed/12148653
			Snodgrassella alvi wkB2	2217	S	Waldan K. Kwong et Nancy A. Moran, « Cultivation and Characterization of the Gut Symbionts of Honey Bees and Bumble Bees: Description of Snodgrassella Alvi Gen. Nov., Sp. Nov., a Member of the Family Neisseriaceae of the Betaproteobacteria, and Gilliamella Apicola Gen. Nov., Sp. Nov., a Member of Orbaceae Fam. Nov., Orbales Ord. Nov., a Sister Taxon to the Order “Enterobacteriales” of the Gammapr…	https://www.ncbi.nlm.nih.gov/pubmed/23041637
			Vitreoscilla filiformis strain ATCC 15551	3418	E	Yann F Mahe et al., « A new Vitreoscilla filiformis extract grown on spa water-enriched medium activates endogenous cutaneous antioxidant and antimicrobial defenses through a potential Toll-like receptor 2/protein kinase C, zeta transduction pathway », Clinical, Cosmetic and Investigational Dermatology 6 (30 août 2013): 191‑96, https://doi.org/10.2147/CCID.S47324.	https://www.ncbi.nlm.nih.gov/pmc/articles/PMC3770492/
		Nitrosomonadales	Ferriphaselus amnicola OYT1	2607	E	Shingo Kato et al., « Ferriphaselus Amnicola Gen. Nov., Sp. Nov., a Neutrophilic, Stalk-Forming, Iron-Oxidizing Bacterium Isolated from an Iron-Rich Groundwater Seep », International Journal of Systematic and Evolutionary Microbiology 64, no Pt 3 (mars 2014): 921‑25, https://doi.org/10.1099/ijs.0.058487-0.	https://www.ncbi.nlm.nih.gov/pubmed/24425821
			Gallionella capsiferriformans ES-2	2864	E	M. Fabisch et al., « Dominance of “Gallionella Capsiferriformans” and Heavy Metal Association with Gallionella-like Stalks in Metal-Rich PH 6 Mine Water Discharge », Geobiology 14, no 1 (janvier 2016): 68‑90, https://doi.org/10.1111/gbi.12162.	https://www.ncbi.nlm.nih.gov/pubmed/26407813
			Sideroxydans lithotrophicus ES-1	2929	E	Christopher R. Beckwith et al., « Characterization of MtoD from Sideroxydans lithotrophicus: a cytochrome c electron shuttle used in lithoautotrophic growth », Frontiers in Microbiology 6 (28 avril 2015), https://doi.org/10.3389/fmicb.2015.00332.	https://www.ncbi.nlm.nih.gov/pmc/articles/PMC4412085/
			Sulfuricella denitrificans skB26	3016	E	Hisaya Kojima et Manabu Fukui, « Sulfuricella Denitrificans Gen. Nov., Sp. Nov., a Sulfur-Oxidizing Autotroph Isolated from a Freshwater Lake », International Journal of Systematic and Evolutionary Microbiology 60, no Pt 12 (décembre 2010): 2862‑66, https://doi.org/10.1099/ijs.0.016980-0.	https://www.ncbi.nlm.nih.gov/pubmed/20081014
			Sulfuriferula sp. AH1	2818	E	Daniel S. Jones et al., « Complete Genome Sequence of Sulfuriferula sp. Strain AH1, a Sulfur-Oxidizing Autotroph Isolated from Weathered Mine Tailings from the Duluth Complex in Minnesota », Genome Announcements 5, no 32 (10 août 2017), https://doi.org/10.1128/genomeA.00673-17.	https://www.ncbi.nlm.nih.gov/pmc/articles/PMC5552976/
			Candidatus Methylopumilus planktonicus	1373	E	Michaela M. Salcher et al., « The Ecology of Pelagic Freshwater Methylotrophs Assessed by a High-Resolution Monitoring and Isolation Campaign », The ISME Journal 9, no 11 (novembre 2015): 2442‑53, https://doi.org/10.1038/ismej.2015.55.	https://www.ncbi.nlm.nih.gov/pubmed?cmd=Retrieve&dopt=Abstract&list_uids=25942006
			Methylobacillus flagellatus KT	2715	E	Ludmila Chistoserdova et al., « Genome of Methylobacillus Flagellatus, Molecular Basis for Obligate Methylotrophy, and Polyphyletic Origin of Methylotrophy », Journal of Bacteriology 189, no 11 (1 juin 2007): 4020‑27, https://doi.org/10.1128/JB.00045-07.	https://jb.asm.org/content/189/11/4020
			Methylophilus sp. TWE2	2859	E	Fei Xia et al., « Complete Genome Sequence of Methylophilus Sp. TWE2 Isolated from Methane Oxidation Enrichment Culture of Tap-Water », Journal of Biotechnology 211 (10 octobre 2015): 121‑22, https://doi.org/10.1016/j.jbiotec.2015.07.023.	https://www.ncbi.nlm.nih.gov/pubmed/26253961
			Methylotenera mobilis JLW8	2326	E	Marina G. Kalyuzhnaya et al., « Methylotenera Mobilis Gen. Nov., Sp. Nov., an Obligately Methylamine-Utilizing Bacterium within the Family Methylophilaceae », International Journal of Systematic and Evolutionary Microbiology 56, no Pt 12 (décembre 2006): 2819‑23, https://doi.org/10.1099/ijs.0.64191-0.	https://www.ncbi.nlm.nih.gov/pubmed/17158982
			Methylovorus glucosetrophus SIP3-4	2884	E	N. V. Doronina, E. N. Kaparulina, et Yu A. Trotsenko, « Emended Description of Methylovorus Glucosotrophus Govorukhina and Trotsenko 1991 », Mikrobiologiia 85, no 5 (septembre 2016): 506‑11.	https://www.ncbi.nlm.nih.gov/pubmed/29364598
			Nitrosomonas europaea ATCC 19718	2544	E	Patrick Chain et al., « Complete Genome Sequence of the Ammonia-Oxidizing Bacterium and Obligate Chemolithoautotroph Nitrosomonas Europaea », Journal of Bacteriology 185, no 9 (mai 2003): 2759‑73, https://doi.org/10.1128/jb.185.9.2759-2773.2003.	https://www.ncbi.nlm.nih.gov/pubmed/12700255
			Nitrosospira multiformis ATCC 25196	2817	E	Jeanette M. Norton et al., « Complete Genome Sequence of Nitrosospira multiformis, an Ammonia-Oxidizing Bacterium from the Soil Environment », Applied and Environmental Microbiology 74, no 11 (juin 2008): 3559‑72, https://doi.org/10.1128/AEM.02722-07.	https://www.ncbi.nlm.nih.gov/pmc/articles/PMC2423025/
			Sulfuritalea hydrogenivorans sk43H	3537	E	Hisaya Kojima et Manabu Fukui, « Sulfuritalea Hydrogenivorans Gen. Nov., Sp. Nov., a Facultative Autotroph Isolated from a Freshwater Lake », International Journal of Systematic and Evolutionary Microbiology 61, no Pt 7 (juillet 2011): 1651‑55, https://doi.org/10.1099/ijs.0.024968-0.	https://www.ncbi.nlm.nih.gov/pubmed/20709913
			Thiobacillus denitrificans ATCC 25259	2771	E	Tracy E. Letain et al., « Development of a Genetic System for the Chemolithoautotrophic Bacterium Thiobacillus denitrificans », Applied and Environmental Microbiology 73, no 10 (mai 2007): 3265‑71, https://doi.org/10.1128/AEM.02928-06.	https://www.ncbi.nlm.nih.gov/pmc/articles/PMC1907124/
		Rhodocyclales	Dechloromonas aromatica RCB	4192	E	Kennan Kellaris Salinero et al., « Metabolic Analysis of the Soil Microbe Dechloromonas Aromatica Str. RCB: Indications of a Surprisingly Complex Life-Style and Cryptic Anaerobic Pathways for Aromatic Degradation », BMC Genomics 10 (3 août 2009): 351, https://doi.org/10.1186/1471-2164-10-351.	https://www.ncbi.nlm.nih.gov/pubmed/19650930
			Azoarcus aromaticum EbN1	4359	E	Kathleen Trautwein et al., « Physiological and Proteomic Adaptation of “Aromatoleum aromaticum” EbN1 to Low Growth Rates in Benzoate-Limited, Anoxic Chemostats », Journal of Bacteriology 194, no 9 (mai 2012): 2165‑80, https://doi.org/10.1128/JB.06519-11.	https://www.ncbi.nlm.nih.gov/pmc/articles/PMC3347066/
			Dechlorosoma suillum PS	3425	E	Kathryne G. Byrne-Bailey et John D. Coates, « Complete Genome Sequence of the Anaerobic Perchlorate-Reducing Bacterium Azospira Suillum Strain PS », Journal of Bacteriology 194, no 10 (mai 2012): 2767‑68, https://doi.org/10.1128/JB.00124-12.	https://www.ncbi.nlm.nih.gov/m/pubmed/22535943/
			Rugosibacter aromaticivorans Ca6	2457	E	Elizabeth M. Corteselli, Michael D. Aitken, et David R. Singleton, « Rugosibacter Aromaticivorans Gen. Nov., Sp. Nov., a Bacterium within the Family Rhodocyclaceae, Isolated from Contaminated Soil, Capable of Degrading Aromatic Compounds », International Journal of Systematic and Evolutionary Microbiology 67, no 2 (février 2017): 311‑18, https://doi.org/10.1099/ijsem.0.001622.	https://www.ncbi.nlm.nih.gov/pubmed/27902243
			Azoarcus communis TSPY31	4060	EnP	Helga Fernández et al., « Azoarcus sp. CIB, an Anaerobic Biodegrader of Aromatic Compounds Shows an Endophytic Lifestyle », PLoS ONE 9, no 10 (23 octobre 2014), https://doi.org/10.1371/journal.pone.0110771.	https://www.ncbi.nlm.nih.gov/pmc/articles/PMC4207700/
			Thauera aromatica K172	3341	E	Birgitta Leuthner et Johann Heider, « Anaerobic Toluene Catabolism of Thauera aromatica: the bbs Operon Codes for Enzymes of β Oxidation of the Intermediate Benzylsuccinate », Journal of Bacteriology 182, no 2 (janvier 2000): 272‑77.	https://www.ncbi.nlm.nih.gov/pmc/articles/PMC94273/
		Unclassified	Candidatus Accumulibacter phosphatis UW-1	4565	E	Shaomei He, Daniel L. Gall, et Katherine D. McMahon, « “Candidatus Accumulibacter” Population Structure in Enhanced Biological Phosphorus Removal Sludges as Revealed by Polyphosphate Kinase Genes », Applied and Environmental Microbiology 73, no 18 (septembre 2007): 5865‑74, https://doi.org/10.1128/AEM.01207-07.	https://www.ncbi.nlm.nih.gov/pmc/articles/PMC2074919/
			Candidatus Kinetoplastibacterium blastocrithidii	728	EnS	João M. P. Alves et al., « Genome Evolution and Phylogenomic Analysis of Candidatus Kinetoplastibacterium, the Betaproteobacterial Endosymbionts of Strigomonas and Angomonas », Genome Biology and Evolution 5, no 2 (2013): 338‑50, https://doi.org/10.1093/gbe/evt012.	https://www.ncbi.nlm.nih.gov/pubmed/23345457
			Candidatus Nasuia deltocephalinicola NAS-ALF	138	EnS	Gordon M. Bennett et al., « Complete Genome Sequences of the Obligate Symbionts “Candidatus Sulcia muelleri” and “Ca. Nasuia deltocephalinicola” from the Pestiferous Leafhopper Macrosteles quadripunctulatus (Hemiptera: Cicadellidae) », Genome Announcements 4, no 1 (21 janvier 2016), https://doi.org/10.1128/genomeA.01604-15.	https://www.ncbi.nlm.nih.gov/pmc/articles/PMC4722273/
			Candidatus Profftella armatura DC	358	EnS	F. Wu et al., « Whole-Genome Sequence of “Candidatus Profftella armatura” from Diaphorina citri in Guangdong, China », Genome Announcements 3, no 6 (5 novembre 2015), https://doi.org/10.1128/genomeA.01282-15.	https://www.ncbi.nlm.nih.gov/pmc/articles/PMC4645202/
			Candidatus Tremblaya princeps PCVAL	180	EnS	Sergio López-Madrigal et al., « Complete Genome Sequence of “Candidatus Tremblaya princeps” Strain PCVAL, an Intriguing Translational Machine below the Living-Cell Status », Journal of Bacteriology 193, no 19 (octobre 2011): 5587‑88, https://doi.org/10.1128/JB.05749-11.	https://www.ncbi.nlm.nih.gov/pmc/articles/PMC3187454/
			Candidatus Vidania fulgoroideae OLIH	154	EnS	Julie M. Urban et Jason R. Cryan, « Two Ancient Bacterial Endosymbionts Have Coevolved with the Planthoppers (Insecta: Hemiptera: Fulgoroidea) », BMC Evolutionary Biology 12 (14 juin 2012): 87, https://doi.org/10.1186/1471-2148-12-87.	https://www.ncbi.nlm.nih.gov/pubmed/22697166
