# Supplementary material for: Relationships Between Copper-Related Proteomes and Lifestyles in β Proteobacteria
Source: Front Microbiol. 2019 Sep 24;10:2217. doi: 10.3389/fmicb.2019.02217 (PMC6769254; doi:10.3389/fmicb.2019.02217)
Supplement: TABLE S2 — Copper-related proteomes of β proteobacteria. The list of the 119 species analyzed in this study is shown. The species are sorted according to phylogenetic analyses. The GenBank accession numbers of the replicons are given as well as their total sizes in megabases (Mb). The GC content (% GC) and the sizes of the proteomes (numbers of predicted proteins) are also reported. For each Pfam domain, the number of occurrences in each species is given as well as the locus_tag name (ID xxxx) found in the corresponding GenBank file. For respiratory components no locus_tag is given but only the number of occurrences of these multi-component systems. [file Table_2.XLSX]

## Sheet: Feuil1
Table S2. Copper-related proteomes of beta proteobacteria.
List of the 119 ß proteobacterial species analyzed in this study. The species are sorted according to phylogenetic analyses.
The GenBank accession numbers of the replicons are given as well as the total size in megabases (Mb).
The GC content (% GC) and the size of the proteome are also reported.
For each Pfam domain, the number of occurrences of this domain in each species is given as well as the locus_tag name (IDs xxxx) found in the corresponding Genbank file.
For the respiratory chain components, no locus_tag is given but only the number of occurrences of these multi-component systems.
Species	GenBank Accession	Total Size (Mb)	% GC	Proteins	Cu ATPases	IDs Cu ATPases	RNDs HME	IDs RNDs HME	MCOs	IDs MCOs	Nitrite reductase	IDs Nitrite reductase	CopB	IDs CopB	CopC	IDs CopC	CopD	IDs CopD	CopK	IDs CopK	Copper-bind	IDs Copper-bind	Cu_amine_oxid	IDs Cu_amine_oxid	Cu-oxidase_4	IDs Cu-oxidase_4	Cupredoxin_1	IDs Cupredoxin_1	CusF_EC	IDs CusF_EC	CutA1	IDs CutA1	CutC	IDs CutC	DUF386	IDs DUF386	HMA	IDs HMA	Monooxygenase_B	IDs Monooxygenase_B	NnrS	IDs NnrS	PCuAC	IDs PCuAC	SCO1-SenC	IDs SCO1-SenC	Sod_Cu	IDs Sod_Cu	Tyrosinase
Achromobacter xylosoxidans A8	NC_014640/NC_014641/NC_014642	7.359	65.79	6747	3	AXYL_RS05605/AXYL_RS28445/AXYL_RS29565	2	AXYL_RS05660/AXYL_RS23150	2	AXYL_RS05585/AXYL_RS28435	1	AXYL_RS11875	2	AXYL_RS05590/AXYL_RS28440	1	AXYL_RS05610	2	AXYL_RS05615/AXYL_RS26030	1	AXYL_RS05620	2	AXYL_RS22520/AXYL_RS28430	0		1	AXYL_RS08265	2	AXYL_RS08295/AXYL_RS29580	2	AXYL_RS05655/AXYL_RS31005	1	AXYL_RS31760	0		0		2	AXYL_RS05325/AXYL_RS16905	0		1	AXYL_RS14685	2	AXYL_RS26155/AXYL_RS30595	3	AXYL_RS01125/AXYL_RS13500/AXYL_RS26150	1	AXYL_RS18085	0
Advenella mimigardefordensis DPN7	NZ_CP003915/NZ_CP003916	4.764	54.26	4276	1	MIM_RS19535	0		1	MIM_RS16560	0		0		0		0		0		3	MIM_RS12925/MIM_RS15685/MIM_RS22535	0		1	MIM_RS07160	1	MIM_RS03210	1	MIM_RS02630	1	MIM_RS20560	0		0		2	MIM_RS01425/MIM_RS19840	0		1	MIM_RS07890	2	MIM_RS15220/MIM_RS15790	4	MIM_RS02415/MIM_RS10075/MIM_RS13275/MIM_RS15215	1	MIM_RS05165	0
Alcaligenes faecalis ZD02	NZ_CP013119/NZ_CP013143	4.248	56.81	3785	1	UZ73_RS18800	0		1	UZ73_RS18835	1	UZ73_RS13490	0		1	UZ73_RS17370	1	UZ73_RS17370	0		1	UZ73_RS19105	0		1	UZ73_RS05280	0		1	UZ73_RS08655	1	UZ73_RS11275	0		0		2	UZ73_RS01605/UZ73_RS07425	0		1	UZ73_RS17620	2	UZ73_RS15055/UZ73_RS16090	3	UZ73_RS00530/UZ73_RS07865/UZ73_RS16095	1	UZ73_RS12650	0
Basilea psittacipulmonis DSM 24701	NZ_CP009238	1.913	40.25	1637	1	IX83_RS07150	0		0		1	IX83_RS07530	0		0		0		0		2	IX83_RS01430/IX83_RS08450	0		1	IX83_RS01785	0		1	IX83_RS06320	1	IX83_RS08345	0		0		1	IX83_RS07145	0		2	IX83_RS03120/IX83_RS03125	2	IX83_RS07155/IX83_RS07540	2	IX83_RS03635/IX83_RS07535	0		0
Bordetella avium 197N	NC_010645	3.732	61.6	3317	1	BAV_RS03135	0		0		0		0		0		0		0		0		0		1	BAV_RS06105	1	BAV_RS06130	1	BAV_RS00725	1	BAV_RS00335	0		0		1	BAV_RS09725	0		0		1	BAV_RS05035	2	BAV_RS08175/BAV_RS16320	1	BAV_RS12240	0
Bordetella bronchialis strain AU3182	NZ_CP016170	5.878	67.3	5084	2	BAU06_RS11135/BAU06_RS13255	0		1	BAU06_RS13040	0		1	BAU06_RS13045	2	BAU06_RS13050/BAU06_RS16880	2	BAU06_RS13055/BAU06_RS16880	0		0		0		1	BAU06_RS18230	1	BAU06_RS18205	1	BAU06_RS24585	1	BAU06_RS25415	0		0		1	BAU06_RS11140	0		0		1	BAU06_RS24310	2	BAU06_RS01045/BAU06_RS11170	1	BAU06_RS21295	0
Bordetella bronchiseptica strain RB50	NC_002927	5.339	68.1	4993	1	AYT36_RS05960	0		1	AYT36_RS23270	0		1	AYT36_RS23265	0		1	AYT36_RS06555	0		2	AYT36_RS19565/AYT36_RS23275	0		1	AYT36_RS18275	1	AYT36_RS18250	1	AYT36_RS00905	1	AYT36_RS00325	0		0		1	AYT36_RS15305	0		1	AYT36_RS12745	1	AYT36_RS01195	2	AYT36_RS12910/AYT36_RS24485	1	AYT36_RS17060	0
Bordetella flabilis strain AU10664	NZ_CP016172/NZ_CP016173	5.954	65.94	5238	1	BAU07_RS15545	0		1	BAU07_RS12665	0		1	BAU07_RS12660	1	BAU07_RS12655	1	BAU07_RS12650	0		0		0		1	BAU07_RS08055	1	BAU07_RS08080	1	BAU07_RS24730	1	BAU07_RS25540	0		0		1	BAU07_RS15540	0		0		1	BAU07_RS24470	2	BAU07_RS00885/BAU07_RS15520	1	BAU07_RS05100	0
Bordetella hinzii strain F582	NZ_CP012076	4.912	67.1	4502	3	ACR54_RS10835/ACR54_RS12680/ACR54_RS18630	0		1	ACR54_RS20960	0		1	ACR54_RS20965	0		0		0		1	ACR54_RS20955	0		1	ACR54_RS15890	1	ACR54_RS15865	1	ACR54_RS00800	1	ACR54_RS00340	0		0		1	ACR54_RS10840	0		0		1	ACR54_RS01165	2	ACR54_RS13500/ACR54_RS22100	1	ACR54_RS06880	0
Bordetella holmesii ATCC 51541	NZ_CP007494	3.699	62.7	3004	1	D560_RS16665	0		0		0		0		0		1	D560_RS12895	0		1	D560_RS02410	0		0		1	D560_RS11000	1	D560_RS05770	1	D560_RS06610	0		0		1	D560_RS16660	0		0		1	D560_RS05420	2	D560_RS07355/D560_RS15070	1	D560_RS13295	0
Bordetella parapertussis strain 12822	NC_002928	4.773	68.1	4168	1	BPP_RS04805	0		1	BPP_RS20725	0		1	BPP_RS20720	0		1	BPP_RS05375	0		2	BPP_RS17160/BPP_RS20730	0		1	BPP_RS16115	1	BPP_RS16090	1	BPP_RS00900	1	BPP_RS00325	0		0		1	BPP_RS15390	0		1	BPP_RS07115	1	BPP_RS01190	2	BPP_RS07290/BPP_RS21350	1	BPP_RS08785	0
Bordetella pertussis Tohama I	NC_002929	4.086	67.7	3425	1	BP2860	0		1	BP3315	0		1	BP3316	0		1	BP2917	0		2	BP0824/BP3314	0		1	BP1148	1	BP1153	1	BP3088	1	BP3645	0		0		1	BP1727	0		1	BP2108	1	BP0562	2	BP0988/BP3734	1	BP2067	0
Bordetella petrii strain DSM 12804	NC_010170	5.287	65.5	4912	2	BPET_RS12840/BPET_RS23180	2	BPET_RS23195/BPET_RS23335	2	BPET_RS23175/BPET_RS23275	0		1	BPET_RS23270	1	BPET_RS23260	2	BPET_RS19280/BPET_RS23245	0		2	BPET_RS22020/BPET_RS23280	0		1	BPET_RS09395	2	BPET_RS09420/BPET_RS22030	3	BPET_RS23190/BPET_RS23200/BPET_RS24285	1	BPET_RS24900	0		0		1	BPET_RS12835	0		1	BPET_RS24040	1	BPET_RS23965	2	BPET_RS00890/BPET_RS15320	1	BPET_RS19545	0
Bordetella pseudohinzii strain HI4681	NZ_CP016440/NZ_CP016441	4.558	66.48	4147	2	BBN53_RS09410/BBN53_RS10895	0		1	BBN53_RS02010	0		1	BBN53_RS02005	0		0		0		1	BBN53_RS02015	0		1	BBN53_RS06415	1	BBN53_RS06440	1	BBN53_RS19885	1	BBN53_RS20385	0		0		1	BBN53_RS10890	0		0		1	BBN53_RS19555	2	BBN53_RS00840/BBN53_RS08625	1	BBN53_RS14840	0
Bordetella trematum strain H044680328	NZ_LT546645/NZ_LT546646	4.485	65.5	3985	1	A6744_RS11595	0		1	A6744_RS10340	0		0		0		0		0		1	A6744_RS20870	0		1	A6744_RS13280	1	A6744_RS13305	1	A6744_RS06800	1	A6744_RS06360	0		0		2	A6744_RS11605/A6744_RS15440	0		0		1	A6744_RS09705	2	A6744_RS05070/A6744_RS09700	1	A6744_RS20480	0
Bordetella sp. H567	NZ_CP012334	5.532	66.1	4864	1	AKI39_RS10330	0		1	AKI39_RS01325	0		1	AKI39_RS01320	1	AKI39_RS16180	1	AKI39_RS16180	0		0		0		1	AKI39_RS17445	2	AKI39_RS12830/AKI39_RS17420	1	AKI39_RS23490	1	AKI39_RS24315	0		0		1	AKI39_RS10335	0		0		1	AKI39_RS23265	4	AKI39_RS00365/AKI39_RS05330/AKI39_RS10370/AKI39_RS13370	1	AKI39_RS20530	0
Bordetella sp. HZ20	NZ_CP028901	4.227	55.5	3581	3	DBV39_RS00395/DBV39_RS09655/DBV39_RS09940	0		2	DBV39_RS09980/DBV39_RS10075	0		1	DBV39_RS09975	0		0		0		2	DBV39_RS09970/DBV39_RS15950	0		1	DBV39_RS09035	0		1	DBV39_RS02405	1	DBV39_RS14025	0		0		3	DBV39_RS03605/DBV39_RS06795/DBV39_RS10050	0		1	DBV39_RS12365	2	DBV39_RS00735/DBV39_RS09605	2	DBV39_RS00670/DBV39_RS15595	0		0
Bordetella sp. J329	NZ_CP021250	3.925	62.3	3377	1	CBF45_RS08760	0		0		0		0		1	CBF45_RS06855	1	CBF45_RS06850	0		0		1	CBF45_RS00455	1	CBF45_RS11235	1	CBF45_RS02510	1	CBF45_RS15800	1	CBF45_RS16335	0		0		2	CBF45_RS00040/CBF45_RS08755	0		1	CBF45_RS01200	0		0		0		0
Bordetella sp. N	NZ_CP013111	6.989	64.8	5955	0		0		0		0		0		1	ASB57_RS06960	1	ASB57_RS06965	0		0		0		1	ASB57_RS01370	2	ASB57_RS01395/ASB57_RS13030	0		1	ASB57_RS22415	0		0		1	ASB57_RS10010	0		0		1	ASB57_RS21605	2	ASB57_RS09975/ASB57_RS23805	1	ASB57_RS00735	0
Castellaniella defragrans 65Phen	NZ_HG916765	3.952	68.9	3428	2	BN940_RS09415/BN940_RS09820	0		1	BN940_RS09805	2	BN940_RS02070/BN940_RS07090	1	BN940_RS09800	1	BN940_RS08560	1	BN940_RS08560	0		4	BN940_RS02585/BN940_RS06780/BN940_RS07090/BN940_RS09795	0		1	BN940_RS12365	1	BN940_RS12340	1	BN940_RS02110	1	BN940_RS00405	0		0		2	BN940_RS00995/BN940_RS09425	0		2	BN940_RS15180/BN940_RS17475	1	BN940_RS16390	3	BN940_RS01935/BN940_RS02260/BN940_RS09435	0		0
Oligella urethralis strain FDAARGOS_329	NZ_CP027417	2.511	46.1	2239	1	CEQ07_RS07340	0		0		1	CEQ07_RS04645	0		0		0		0		1	CEQ07_RS08755	0		1	CEQ07_RS02915	1	CEQ07_RS02835	1	CEQ07_RS01445	1	CEQ07_RS00240	0		0		2	CEQ07_RS06260/CEQ07_RS11420	0		2	CEQ07_RS00905/CEQ07_RS04610	3	CEQ07_RS00580/CEQ07_RS02210/CEQ07_RS04635	4	CEQ07_RS02205/CEQ07_RS04640/CEQ07_RS06035/CEQ07_RS10465	1	CEQ07_RS02085	0
Orrella dioscoreae LMG 29303	NZ_LT907988	4.848	67.4	4333	1	ODI_RS12280	0		0		1	ODI_RS16780	0		0		1	ODI_RS13405	0		1	ODI_RS19105	0		1	ODI_RS14435	1	ODI_RS05035	1	ODI_RS21620	1	ODI_RS00290	0		0		1	ODI_RS12275	0		1	ODI_RS05670	2	ODI_RS02060/ODI_RS19870	3	ODI_RS01560/ODI_RS12260/ODI_RS19875	1	ODI_RS15665	0
Paenalcaligenes hominis strain 15S00501	NZ_CP019697	2.688	48.4	2115	0		0		1	PAEH1_RS13025	0		0		0		0		0		1	PAEH1_RS07185	0		1	PAEH1_RS12400	0		1	PAEH1_RS10410	1	PAEH1_RS07830	0		0		1	PAEH1_RS02175	0		0		1	PAEH1_RS06195	1	PAEH1_RS02165	0		0
Taylorella equigenitalis ATCC 35865	NC_018108	1.732	37.3	1536	1	KUI_RS07640	0		0		1	KUI_RS07625	0		0		0		0		1	KUI_RS02185	0		0		0		1	KUI_RS01035	0		0		0		0		0		2	KUI_RS03350/KUI_RS03420	1	KUI_RS01865	2	KUI_RS03845/KUI_RS07630	0		0
Burkholderia ambifaria MC40-6	NC_010551/NC_010552/NC_010557/NC_010553	7.642	66.38	6575	3	BAMMC406_RS17070/BAMMC406_RS23245/BAMMC406_RS26930	1	BAMMC406_RS16850	2	BAMMC406_RS12365/BAMMC406_RS16890	0		0		2	BAMMC406_RS16900/BAMMC406_RS24715	3	BAMMC406_RS11565/BAMMC406_RS13125/BAMMC406_RS16905	0		1	BAMMC406_RS28115	0		1	BAMMC406_RS08640	4	BAMMC406_RS10795/BAMMC406_RS14665/BAMMC406_RS16120/BAMMC406_RS23150	4	BAMMC406_RS16845/BAMMC406_RS16855/BAMMC406_RS16895/BAMMC406_RS21885	1	BAMMC406_RS01595	1	BAMMC406_RS14400	0		1	BAMMC406_RS14670	0		0		2	BAMMC406_RS05320/BAMMC406_RS24720	2	BAMMC406_RS05325/BAMMC406_RS13930	1	BAMMC406_RS11915	0
Burkholderia cenocepacia J2315	NC_011000/NC_011001/NC_011002/NC_011003	8.055	66.92	7317	1	QU43_RS67865	2	QU43_RS56570/QU43_RS57965	2	QU43_RS50280/QU43_RS56630	0		0		3	QU43_RS50095/QU43_RS56640/QU43_RS65440	3	QU43_RS41230/QU43_RS48935/QU43_RS56645	0		0		0		1	QU43_RS45865	3	QU43_RS39580/QU43_RS48135/QU43_RS64155	4	QU43_RS56565/QU43_RS56575/QU43_RS56635/QU43_RS62385	1	QU43_RS37845	1	QU43_RS39835	0		1	QU43_RS39575	0		0		2	QU43_RS41735/QU43_RS65445	2	QU43_RS40355/QU43_RS41740	1	QU43_RS49830	0
Burkholderia cepacia ATCC 25416	NZ_CP012981/NZ_CP012982/NZ_CP012983/NZ_CP012984	8.605	66.6	7614	1	APZ15_RS23925	2	APZ15_RS20845/APZ15_RS26845	2	APZ15_RS00520/APZ15_RS26930	0		0		3	APZ15_RS00345/APZ15_RS26940/APZ15_RS28030	3	APZ15_RS01235/APZ15_RS17140/APZ15_RS26945	0		0		0		1	APZ15_RS13910	3	APZ15_RS02845/APZ15_RS16355/APZ15_RS29135	4	APZ15_RS26840/APZ15_RS26850/APZ15_RS26935/APZ15_RS31220	1	APZ15_RS05475	1	APZ15_RS02590	0		1	APZ15_RS02850	0		0		2	APZ15_RS09500/APZ15_RS28025	2	APZ15_RS02065/APZ15_RS09505	2	APZ15_RS00005/APZ15_RS17465	1
Burkholderia gladioli ATCC10248	NZ_CP009323/NZ_CP009322/NZ_CP009321/NZ_CP009320/NZ_CP009319	8.899	67.62	7386	1	BM43_RS13450	2	BM43_RS04140/BM43_RS08490	2	BM43_RS20365/BM43_RS38195	0		1	BM43_RS01395	2	BM43_RS01400/BM43_RS03910	3	BM43_RS01405/BM43_RS19585/BM43_RS21175	0		0		0		1	BM43_RS34550	1	BM43_RS18520	2	BM43_RS08485/BM43_RS08495	1	BM43_RS25320	1	BM43_RS22465	0		1	BM43_RS00030	0		0		1	BM43_RS03915	3	BM43_RS03920/BM43_RS21900/BM43_RS28995	1	BM43_RS19920	0
Burkholderia glumae BGR1	NC_012724/NC_012721/NC_012723/NC_012718/NC_012720/NC_012725	7.284	67.93	6151	1	BGLU_RS28390	0		1	BGLU_RS15140	0		0		1	BGLU_RS25090	2	BGLU_RS14180/BGLU_RS15880	0		0		0		1	BGLU_RS07360	1	BGLU_RS13465	0		1	BGLU_RS01440	1	BGLU_RS16980	0		0		0		0		1	BGLU_RS25085	3	BGLU_RS04915/BGLU_RS16530/BGLU_RS25080	1	BGLU_RS14725	0
Burkholderia mallei ATCC23344	NC_006348/NC_006349	5.835	68.52	5022	2	BMA3368/BMAA1851	2	BMA3376/BMAA1029	1	BMA0487	2	BMAA0755/BMAA0798	0		1	BMA1963	2	BMA0252/BMA2211	0		0		0		1	BMA1323	3	BMA1408/BMAA0060/BMAA0882	2	BMA3375/BMA3377	1	BMA2603	1	BMA0104	0		0		0		2	BMA0614/BMA0630	1	BMA0563	4	BMA0564/BMA3187/BMAA0753/BMAA1666	1	BMA0713	0
Burkholderia metallica FL-6-5-30-S1-D7	NZ_CP013401/NZ_CP013403/NZ_CP013402	7.424	67.12	6491	1	WJ16_RS31805	1	WJ16_RS22495	1	WJ16_RS12965	0		0		3	WJ16_RS12790/WJ16_RS18410/WJ16_RS29560	3	WJ16_RS12235/WJ16_RS13710/WJ16_RS18415	0		0		0		1	WJ16_RS09200	3	WJ16_RS11475/WJ16_RS15170/WJ16_RS28305	1	WJ16_RS26750	1	WJ16_RS01510	1	WJ16_RS14950	0		1	WJ16_RS15175	0		0		3	WJ16_RS05455/WJ16_RS18420/WJ16_RS29565	2	WJ16_RS05460/WJ16_RS14465	1	WJ16_RS12525	0
Burkholderia multivorans ATCC17616	NC_010804/NC_010805/NC_010801/NC_010802	7.008	66.69	6398	2	BMULJ_RS04475/BMULJ_RS26100	3	BMULJ_RS29150/BMULJ_RS31420/BMULJ_RS31550	3	BMULJ_RS04515/BMULJ_RS12390/BMULJ_RS31515	0		1	BMULJ_RS04510	3	BMULJ_RS04505/BMULJ_RS12210/BMULJ_RS31525	4	BMULJ_RS04500/BMULJ_RS11655/BMULJ_RS13095/BMULJ_RS31530	0		0		0		1	BMULJ_RS08745	3	BMULJ_RS01235/BMULJ_RS10885/BMULJ_RS23065	6	BMULJ_RS21695/BMULJ_RS29145/BMULJ_RS29155/BMULJ_RS31520/BMULJ_RS31545/BMULJ_RS31555	1	BMULJ_RS14880	1	BMULJ_RS14460	0		3	BMULJ_RS01230/BMULJ_RS04485/BMULJ_RS32225	0		0		1	BMULJ_RS05475	2	BMULJ_RS05480/BMULJ_RS13925	1	BMULJ_RS11950	0
Burkholderia plantarii PG1	NZ_CP002580/NZ_CP002581	7.896	68.78	6522	1	BGL_RS32210	0		1	BGL_RS14850	0		0		1	BGL_RS22445	2	BGL_RS14130/BGL_RS15705	0		0		0		1	BGL_RS10900	1	BGL_RS13365	1	BGL_RS27350	1	BGL_RS01405	1	BGL_RS16865	0		0		0		1	BGL_RS28300	1	BGL_RS22450	3	BGL_RS05120/BGL_RS16405/BGL_RS22455	1	BGL_RS14470	0
Burkholderia pseudomallei K96243	NC_006350/NC_006351	7.247	68.05	5726	2	BPSL0302/BPSS0224	2	BPSL0309/BPSS1041	2	BPSL0897/BPSS0456	2	BPSS1452/BPSS1487	0		2	BPSL0931/BPSS0458	3	BPSL0698/BPSL1071/BPSS0459	0		0		0		1	BPSL1533	4	BPSL1454/BPSS0056/BPSS0358/BPSS2000	3	BPSL0308/BPSL0310/BPSS0457	1	BPSL3185	1	BPSL0363	0		1	BPSL0301	0		2	BPSL2355/BPSL2368	1	BPSL2413	6	BPSL0344/BPSL0463/BPSL2058/BPSL2412/BPSS1489/BPSS1651	1	BPSL1001	1
Burkholderia territorii RF8-non-BP5	NZ_CP013366/NZ_CP013365/NZ_CP013367	6.902	66.75	6055	2	WS51_RS10150/WS51_RS28525	1	WS51_RS02015	2	WS51_RS23065/WS51_RS01065	0		0		3	WS51_RS01075/WS51_RS08065/WS51_RS08255	3	WS51_RS01080/WS51_RS22170/WS51_RS23765	0		0		0		1	WS51_RS19375	3	WS51_RS07155/WS51_RS21415/WS51_RS25270	2	WS51_RS01070/WS51_RS05635	1	WS51_RS12325	1	WS51_RS25035	0		1	WS51_RS25275	0		0		2	WS51_RS08260/WS51_RS16060	3	WS51_RS16065/WS51_RS16335/WS51_RS24555	1	WS51_RS22445	0
Cupriavidus metallidurans CH34	NC_007973/NC_007974/NC_007972/NC_007971	6.913	63.52	6316	3	RMET_RS11935/RMET_RS17705/RMET_RS30580	10	RMET_RS21315/RMET_RS23020/RMET_RS25795/RMET_RS27200/RMET_RS27250/RMET_RS29000/RMET_RS30100/RMET_RS30445/RMET_RS30490/RMET_RS31155	4	RMET_RS24170/RMET_RS24175/RMET_RS28965/RMET_RS30615	0		2	RMET_RS28960/RMET_RS33315	2	RMET_RS28955/RMET_RS30605	2	RMET_RS28950/RMET_RS30600	1	RMET_RS30635	1	RMET_RS30595	0		1	RMET_RS06825	2	RMET_RS03030/RMET_RS25225	4	RMET_RS25790/RMET_RS25800/RMET_RS30225/RMET_RS30495	1	RMET_RS16495	0		0		4	RMET_RS11615/RMET_RS17710/RMET_RS30330/RMET_RS31015	0		1	RMET_RS27140	1	RMET_RS00700	3	RMET_RS01380/RMET_RS22300/RMET_RS24140	1	RMET_RS13835	0
Hydromonas sp. F02	NZ_CP031124	2.723	48.3	2438	0		0		1	DTO96_RS05195	0		0		0		1	DTO96_RS12275	0		0		0		1	DTO96_RS10965	3	DTO96_RS01205/DTO96_RS03400/DTO96_RS09415	0		0		0		0		1	DTO96_RS12215	0		1	DTO96_RS05250	1	DTO96_RS02835	1	DTO96_RS01665	0		0
Pandoraea pnomenusa strain DSM 16536	NZ_CP009553	5.389	64.9	4659	1	LV28_RS31840	0		1	LV28_RS46525	0		0		1	LV28_RS46555	2	LV28_RS39680/LV28_RS46560	0		1	LV28_RS46530	0		1	LV28_RS34375	1	LV28_RS29005	0		1	LV28_RS25760	0		0		1	LV28_RS31835	0		0		1	LV28_RS47215	1	LV28_RS45790	0		0
Paraburkholderia phytofirmans PsJN	NC_010681/NC_010676/NC_010679	8.214	62.31	7188	1	BPHYT_RS34125	1	BPHYT_RS10875	1	BPHYT_RS30100	0		0		2	BPHYT_RS10775/BPHYT_RS16425	2	BPHYT_RS05940/BPHYT_RS16420	0		0		1	BPHYT_RS09910	1	BPHYT_RS09140	2	BPHYT_RS06915/BPHYT_RS26460	1	BPHYT_RS30095	1	BPHYT_RS17975	1	BPHYT_RS02010	0		2	BPHYT_RS06860/BPHYT_RS30120	0		0		1	BPHYT_RS14275	2	BPHYT_RS02695/BPHYT_RS14270	1	BPHYT_RS04970	0
Paucimonas lemoignei strain NCTC10937	NZ_LS483371	5.924	58.9	5129	1	DQN78_RS23785	1	DQN78_RS10985	1	DQN78_RS06975	0		0		1	DQN78_RS13695	2	DQN78_RS13700/DQN78_RS21000	0		2	DQN78_RS03925/DQN78_RS09935	0		1	DQN78_RS04840	1	DQN78_RS09130	0		0		0		0		1	DQN78_RS23775	0		0		2	DQN78_RS04165/DQN78_RS26455	2	DQN78_RS00390/DQN78_RS26450	1	DQN78_RS10510	0
Polynucleobacter necessarius STIR1	NC_010531	1.56	45.6	1328	0		0		0		0		0		0		0		0		0		0		1	PNEC_RS04360	0		0		1	PNEC_RS00445	0		0		0		0		0		1	PNEC_RS05530	1	PNEC_RS07685	0		0
Ralstonia solanacearum GMI1000	NC_003295/NC_003296	5.81	66.96	4984	1	RS_RS16775	4	RS_RS19530/RS_RS19710/RS_RS21560/RS_RS22150	4	RS_RS11530/RS_RS11535/RS_RS20260/RS_RS24500	1	RS_RS24360	1	RS_RS20265	1	RS_RS20270	1	RS_RS20275	0		0		0		1	RS_RS08210	2	RS_RS23720/RS_RS25040	2	RS_RS21555/RS_RS21565	1	RS_RS14990	0		0		1	RS_RS16780	0		1	RS_RS17035	1	RS_RS00190	5	RS_RS01835/RS_RS07555/RS_RS11500/RS_RS21890/RS_RS24350	1	RS_RS11890	2
Acidovorax avenae subsp. avenae ATCC 19860	NC_015138	5.482	68.8	4678	1	ACAV_RS00230	3	ACAV_RS00240/ACAV_RS03985/ACAV_RS13430	1	ACAV_RS08635	0		0		0		0		0		2	ACAV_RS13790/ACAV_RS22410	0		1	ACAV_RS13555	0		1	ACAV_RS23805	0		0		0		1	ACAV_RS00225	0		1	ACAV_RS14815	1	ACAV_RS16175	1	ACAV_RS18790	2	ACAV_RS12885/ACAV_RS22005	0
Alicycliphilus denitrificans K601	NC_015422/NC_015423	5.07	67.91	4682	5	ALIDE2_RS00225/ALIDE2_RS10935/ALIDE2_RS13590/ALIDE2_RS13650/ALIDE2_RS16690	7	ALIDE2_RS00235/ALIDE2_RS04815/ALIDE2_RS08305/ALIDE2_RS10960/ALIDE2_RS13615/ALIDE2_RS16790/ALIDE2_RS16850	3	ALIDE2_RS10870/ALIDE2_RS10890/ALIDE2_RS13470	0		1	ALIDE2_RS10895	0		2	ALIDE2_RS06055/ALIDE2_RS10435	0		4	ALIDE2_RS10900/ALIDE2_RS11920/ALIDE2_RS13465/ALIDE2_RS17270	0		1	ALIDE2_RS12225	1	ALIDE2_RS06835	6	ALIDE2_RS10905/ALIDE2_RS10955/ALIDE2_RS13460/ALIDE2_RS13620/ALIDE2_RS13670/ALIDE2_RS24630	1	ALIDE2_RS04890	0		0		7	ALIDE2_RS00220/ALIDE2_RS10785/ALIDE2_RS16750/ALIDE2_RS24415/ALIDE2_RS24495/ALIDE2_RS24620/ALIDE2_RS24850	0		2	ALIDE2_RS12930/ALIDE2_RS18125	1	ALIDE2_RS18160	3	ALIDE2_RS08210/ALIDE2_RS19365/ALIDE2_RS19645	0		0
Candidatus Symbiobacter mobilis CR	NC_022576	2.99	59.1	2337	1	CENROD_RS10635	0		0		0		0		0		0		0		0		0		1	CENROD_RS11680	0		0		1	CENROD_RS03400	0		0		0		0		0		0		0		0		0
Comamonas testosteroni TK102	NZ_CP006704	6.062	61.9	5295	2	O987_RS03080/O987_RS14240	10	O987_RS00095/O987_RS04585/O987_RS08555/O987_RS09820/O987_RS09960/O987_RS14050/O987_RS14290/O987_RS20790/O987_RS23875/O987_RS25040	2	O987_RS09015/O987_RS14255	0		1	O987_RS14250	1	O987_RS28105	2	O987_RS12935/O987_RS14245	0		3	O987_RS01320/O987_RS09010/O987_RS17825	0		1	O987_RS14690	0		2	O987_RS09000/O987_RS14290	1	O987_RS22620	0		0		2	O987_RS00135/O987_RS14270	0		0		2	O987_RS01890/O987_RS10065	1	O987_RS22745	2	O987_RS10855/O987_RS13490	0
Delftia acidovorans SPH-1	NC_010002	6.767	66.5	6052	2	DACI_RS02225/DACI_RS28935	10	DACI_RS00090/DACI_RS02370/DACI_RS05515/DACI_RS07780/DACI_RS08600/DACI_RS08685/DACI_RS13580/DACI_RS13800/DACI_RS19645/DACI_RS24015	3	DACI_RS02250/DACI_RS14605/DACI_RS16980	0		1	DACI_RS02245	1	DACI_RS02220	1	DACI_RS02215	1	DACI_RS02210	2	DACI_RS14600/DACI_RS21310	0		1	DACI_RS18140	0		3	DACI_RS02360/DACI_RS02375/DACI_RS14590	1	DACI_RS08945	0		0		2	DACI_RS00175/DACI_RS02430	0		0		4	DACI_RS02670/DACI_RS13490/DACI_RS14505/DACI_RS14530	3	DACI_RS08465/DACI_RS09980/DACI_RS31210	1	DACI_RS19760	1
Diaphorobacter polyhydroxybutyrativorans SL-205	NZ_CP016278	4.061	66.7	3639	3	BA022_RS04025/BA022_RS07960/BA022_RS15045	1	BA022_RS07515	1	BA022_RS07940	0		0		0		2	BA022_RS01175/BA022_RS02860	0		2	BA022_RS07945/BA022_RS08965	0		1	BA022_RS05860	1	BA022_RS09735	1	BA022_RS07955	1	BA022_RS18500	0		0		1	BA022_RS15050	0		3	BA022_RS00340/BA022_RS02060/BA022_RS13070	1	BA022_RS00285	1	BA022_RS18475	1	BA022_RS04275	0
Hydrogenophaga crassostreae LPB0072	NZ_CP017476	4.944	61.3	4500	3	LPB072_RS00355/LPB072_RS11195/LPB072_RS11485	1	LPB072_RS11360	3	LPB072_RS06825/LPB072_RS11250/LPB072_RS11445	0		2	LPB072_RS11255/LPB072_RS11440	0		1	LPB072_RS00565	2	LPB072_RS11245/LPB072_RS11470	3	LPB072_RS06830/LPB072_RS11260/LPB072_RS11435	0		1	LPB072_RS09715	0		2	LPB072_RS06840/LPB072_RS11355	0		0		0		3	LPB072_RS00350/LPB072_RS11410/LPB072_RS22100	0		2	LPB072_RS17890/LPB072_RS21975	1	LPB072_RS19305	2	LPB072_RS11505/LPB072_RS19060	0		0
Limnohabitans sp. 63ED37-2	NZ_CP011774	3.372	59.9	3152	1	L63ED372_RS14955	1	L63ED372_RS09715	1	L63ED372_RS01475	0		0		0		1	L63ED372_RS13990	0		1	L63ED372_RS01480	0		1	L63ED372_RS09885	0		0		0		0		0		2	L63ED372_RS09610/L63ED372_RS14950	0		0		2	L63ED372_RS13580/L63ED372_RS13595	1	L63ED372_RS12025	0		0
Melaminivora sp. SC2-9.gb	NZ_CP027667	3.754	68.2	3401	2	C6568_RS05535/C6568_RS08765	2	C6568_RS05510/C6568_RS05615	1	C6568_RS05565	0		0		0		2	C6568_RS00580/C6568_RS14800	0		1	C6568_RS05560	0		1	C6568_RS00840	0		2	C6568_RS05515/C6568_RS05555	1	C6568_RS12560	0		0		1	C6568_RS08770	0		1	C6568_RS17210	1	C6568_RS03465	2	C6568_RS03415/C6568_RS12545	0		0
Ottowia oryzae strain KADR8-3	NZ_CP027666	3.901	66.8	3437	1	C6570_RS08820	0		2	C6570_RS02670/C6570_RS08790	1	C6570_RS07185	2	C6570_RS02665/C6570_RS08795	0		0		0		3	C6570_RS07185/C6570_RS08800/C6570_RS09130	0		1	C6570_RS10385	1	C6570_RS09365	1	C6570_RS09110	1	C6570_RS03450	0		0		1	C6570_RS03160	0		1	C6570_RS07605	1	C6570_RS05555	1	C6570_RS06480	1	C6570_RS00585	0
Polaromonas naphthalenivorans CJ2	NC_008781/NC_008757/NC_008758/NC_008759/NC_008760/NC_008761/NC_008762/NC_008763/NC_008764	5.366	61.65	4879	5	PNAP_RS06300/PNAP_RS20385/PNAP_RS22300/PNAP_RS22480/PNAP_RS22580	4	PNAP_RS10930/PNAP_RS10945/PNAP_RS22425/PNAP_RS22690	2	PNAP_RS06315/PNAP_RS22605	1	PNAP_RS06645	0		0		1	PNAP_RS01215	1	PNAP_RS22625	3	PNAP_RS06645/PNAP_RS22600/PNAP_RS25570	0		1	PNAP_RS14015	1	PNAP_RS19255	4	PNAP_RS22420/PNAP_RS22595/PNAP_RS22645/PNAP_RS25570	0		0		0		6	PNAP_RS20380/PNAP_RS22280/PNAP_RS22290/PNAP_RS22460/PNAP_RS22470/PNAP_RS22550	0		1	PNAP_RS19790	1	PNAP_RS07560	1	PNAP_RS04415	0		0
Ramlibacter tataouinensis TTB310	NC_015677	4.07	70	3845	1	RTA_RS14790	0		2	RTA_RS11340/RTA_RS13430	0		0		0		0		0		1	RTA_RS20230	0		1	RTA_RS09270	0		1	RTA_RS20230	1	RTA_RS17190	0		0		2	RTA_RS05990/RTA_RS06005	0		0		1	RTA_RS18640	1	RTA_RS17215	1	RTA_RS05800	0
Rhodoferax ferrireducens T118	NC_007908/NC_007901	4.969	59.62	4479	3	RFER_RS00125/RFER_RS02085/RFER_RS05730	1	RFER_RS02050	0		0		0		0		1	RFER_RS06120	1	RFER_RS02080	0		0		1	RFER_RS12955	2	RFER_RS16195/RFER_RS16740	2	RFER_RS02055/RFER_RS02075	0		0		0		2	RFER_RS00120/RFER_RS05725	0		2	RFER_RS09520/RFER_RS21040	2	RFER_RS03065/RFER_RS03075	2	RFER_RS08555/RFER_RS20895	0		0
Simplicispira suum strain SC1-8	NZ_CP027669/NZ_CP027670/NZ_CP027671	4.154	63.25	3693	2	C6571_RS07315/C6571_RS10870	0		1	C6571_RS10835	1	C6571_RS17165	1	C6571_RS10840	0		1	C6571_RS16045	0		1	C6571_RS10845	0		1	C6571_RS16095	1	C6571_RS06800	0		1	C6571_RS12065	0		0		4	C6571_RS05220/C6571_RS07320/C6571_RS10785/C6571_RS18275	0		3	C6571_RS00260/C6571_RS09280/C6571_RS17890	1	C6571_RS05295	3	C6571_RS06315/C6571_RS10520/C6571_RS12040	1	C6571_RS16895	0
Variovorax paradoxus B4	NC_022247/NC_022234	7.148	67.14	6565	2	VAPA_RS00155/VAPA_RS03770	2	VAPA_RS18110/VAPA_RS30925	1	VAPA_RS28090	0		0		0		0		0		2	VAPA_RS08060/VAPA_RS28095	0		1	VAPA_RS10545	0		3	VAPA_RS23060/VAPA_RS28100/VAPA_RS30920	0		0		0		1	VAPA_RS00150	0		1	VAPA_RS29250	1	VAPA_RS24240	1	VAPA_RS22460	1	VAPA_RS18935	0
Verminephrobacter eiseniae EF01-2	NC_008786/NC_008771	5.597	65.26	4757	1	VEIS_RS05215	0		0		0		0		0		0		0		1	VEIS_RS08130	0		1	VEIS_RS18490	1	VEIS_RS17455	0		0		0		0		1	VEIS_RS05020	0		0		1	VEIS_RS23925	1	VEIS_RS06770	0		0
Candidatus Zinderia insecticola CARI	CP002161	0.208	13.5	206	0		0		0		0		0		0		0		0		0		0		0		0		0		0		0		0		0		0		0		0		0		0		0
Collimonas fungivorans Ter331	NC_015856	5.186	59.6	4550	1	CFU_RS15280	2	CFU_RS07765/CFU_RS13000	1	CFU_RS15300	0		0		0		0		0		0		0		1	CFU_RS09160	2	CFU_RS09280/CFU_RS09515	2	CFU_RS15305/CFU_RS15315	1	CFU_RS02255	0		0		1	CFU_RS15270	0		0		1	CFU_RS20875	1	CFU_RS02905	0		0
Herbaspirillum seropedicae SmR1	NC_014323	5.513	63.4	4711	1	HSERO_RS08020	1	HSERO_RS22160	1	HSERO_RS07985	0		0		0		1	HSERO_RS13390	0		0		1	HSERO_RS17625	1	HSERO_RS15065	1	HSERO_RS13655	1	HSERO_RS07980	1	HSERO_RS00710	0		0		1	HSERO_RS08025	0		1	HSERO_RS24470	1	HSERO_RS20845	1	HSERO_RS20740	1	HSERO_RS10680	0
Herminiimonas arsenicoxydans	NC_009138	3.424	54.3	3186	2	HEAR_RS07220/HEAR_RS15415	6	HEAR_RS02400/HEAR_RS02435/HEAR_RS07195/HEAR_RS07385/HEAR_RS07435/HEAR_RS15150	4	HEAR_RS02455/HEAR_RS07175/HEAR_RS07305/HEAR_RS15175	1	HEAR_RS15160	2	HEAR_RS02460/HEAR_RS07170	2	HEAR_RS02470/HEAR_RS07165	3	HEAR_RS02475/HEAR_RS07160/HEAR_RS14025	0		3	HEAR_RS05530/HEAR_RS06365/HEAR_RS07310	0		1	HEAR_RS08930	0		5	HEAR_RS02430/HEAR_RS02440/HEAR_RS07190/HEAR_RS07200/HEAR_RS07320	1	HEAR_RS14645	0		0		3	HEAR_RS07635/HEAR_RS15425/HEAR_RS16525	0		1	HEAR_RS07620	2	HEAR_RS00250/HEAR_RS13620	1	HEAR_RS13555	1	HEAR_RS03850	0
Janthinobacterium svalbardensis PAMC 27463	NZ_CP023422	6.274	62.1	5359	2	CNX70_RS18505/CNX70_RS22235	4	CNX70_RS04095/CNX70_RS14215/CNX70_RS18570/CNX70_RS24950	2	CNX70_RS18525/CNX70_RS19435	1	CNX70_RS25615	0		1	CNX70_RS18515	1	CNX70_RS18510	0		1	CNX70_RS25615	0		1	CNX70_RS18090	0		2	CNX70_RS18520/CNX70_RS18565	0		0		0		2	CNX70_RS11710/CNX70_RS22225	0		1	CNX70_RS14440	1	CNX70_RS12625	2	CNX70_RS05470/CNX70_RS12620	0		0
Massilia violaceinigra strain B2	NZ_CP024608/NZ_CP024609	7.53	63.46	6222	2	CR152_RS10515/CR152_RS19750	1	CR152_RS23570	1	CR152_RS10490	1	CR152_RS22680	0		0		0		0		0		0		1	CR152_RS25500	0		0		0		0		0		1	CR152_RS10510	0		1	CR152_RS22870	1	CR152_RS29220	3	CR152_RS07845/CR152_RS22670/CR152_RS26790	0		0
Oxalobacter formigenes strain HC-1	NZ_CP018787	2.468	49.6	2232	3	BRW83_RS05625/BRW83_RS08755/BRW83_RS08940	0		0		0		1	BRW83_RS04570	0		0		0		0		0		1	BRW83_RS03355	0		0		1	BRW83_RS00235	0		0		0		0		0		0		0		0		0
Leptothrix cholodnii SP-6	NC_010524	4.909	68.9	4300	2	LCHO_RS00740/LCHO_RS09185	2	LCHO_RS00720/LCHO_RS10275	1	LCHO_RS06315	0		0		0		0		0		1	LCHO_RS06320	0		1	LCHO_RS10470	1	LCHO_RS07395	2	LCHO_RS02705/LCHO_RS10280	0		0		0		1	LCHO_RS09180	0		2	LCHO_RS07355/LCHO_RS07405	2	LCHO_RS10005/LCHO_RS10015	9	LCHO_RS00245/LCHO_RS00355/LCHO_RS03250/LCHO_RS10010/LCHO_RS18870/LCHO_RS19060/LCHO_RS19380/LCHO_RS19385/LCHO_RS22255	0		0
Methylibium petroleiphilum PM1	NC_008825/NC_008826	4.643	68.78	4452	3	MPE_RS08255/MPE_RS08280/MPE_RS17865	4	MPE_RS08200/MPE_RS08300/MPE_RS11900/MPE_RS13485	2	MPE_RS02485/MPE_RS08225	0		0		0		1	MPE_RS08625	0		0		0		1	MPE_RS09420	1	MPE_RS08230	3	MPE_RS02475/MPE_RS08195/MPE_RS08240	0		0		0		3	MPE_RS08260/MPE_RS08375/MPE_RS17870	0		1	MPE_RS08570	1	MPE_RS03470	1	MPE_RS16010	0		0
Mitsuaria sp. 7	NZ_CP011514/NZ_CP011515	6.085	68.28	5232	0		1	ABE85_RS07895	0		0		0		0		0		0		1	ABE85_RS19470	0		1	ABE85_RS00160	0		0		0		0		0		0		0		0		2	ABE85_RS11760/ABE85_RS16385	1	ABE85_RS11755	2	ABE85_RS10670/ABE85_RS12260	0
Paucibacter sp. KCTC 42545	NZ_CP013692	5.169	63.2	4296	1	AT984_RS15725	1	AT984_RS10580	1	AT984_RS00765	0		0		0		0		0		0		0		1	AT984_RS03025	0		1	AT984_RS00775	0		0		0		2	AT984_RS03435/AT984_RS15720	0		2	AT984_RS08140/AT984_RS08155	2	AT984_RS00845/AT984_RS03765	1	AT984_RS01980	1	AT984_RS19285	0
Rhizobacter gummiphilus NS21	NZ_CP015118	6.398	69.7	5748	1	A4W93_RS16455	1	A4W93_RS25055	1	A4W93_RS13625	0		0		0		1	A4W93_RS09015	0		2	A4W93_RS13630/A4W93_RS14220	0		1	A4W93_RS10530	0		1	A4W93_RS13640	0		0		0		1	A4W93_RS16460	0		1	A4W93_RS18830	1	A4W93_RS26450	1	A4W93_RS23825	2	A4W93_RS00915/A4W93_RS22945	0
Roseateles depolymerans KCTC 42856	NZ_CP013729	5.681	66.6	4715	1	RD2015_RS21735	1	RD2015_RS23665	1	RD2015_RS04510	0		0		0		0		0		0		0		1	RD2015_RS06645	0		1	RD2015_RS04505	0		0		0		1	RD2015_RS21730	0		0		1	RD2015_RS06200	1	RD2015_RS20425	1	RD2015_RS14510	0
Rubrivivax gelatinosus IL144	NC_017075	5.043	71.2	4533	1	RGE_RS17660	1	RGE_RS14425	0		0		0		0		0		0		1	RGE_RS17675	0		1	RGE_RS11565	2	RGE_RS09370/RGE_RS10845	0		0		0		1	RGE_RS02705	1	RGE_RS18015	0		2	RGE_RS09155/RGE_RS10425	3	RGE_RS18075/RGE_RS21595/RGE_RS23180	1	RGE_RS20355	1	RGE_RS19175	0
Thiomonas intermedia strain ATCC 15466	NZ_CP020046/NZ_CP020047	3.343	65.04	3009	2	BVH73_RS06020/BVH73_RS07625	2	BVH73_RS07590/BVH73_RS07660	1	BVH73_RS05370	0		0		0		1	BVH73_RS06335	0		0		0		1	BVH73_RS14525	2	BVH73_RS04270/BVH73_RS06235	1	BVH73_RS05375	0		0		0		1	BVH73_RS06030	0		0		2	BVH73_RS04445/BVH73_RS08095	3	BVH73_RS10545/BVH73_RS12945/BVH73_RS12955	0		0
Aquitalea magnusonii H3	NZ_AP018823	4.852	59.3	4407	1	DLM_RS02205	0		1	DLM_RS15735	0		0		1	DLM_RS11005	1	DLM_RS11010	0		0		0		1	DLM_RS09475	2	DLM_RS10975/DLM_RS17980	0		1	DLM_RS21710	0		0		1	DLM_RS02210	0		1	DLM_RS14040	1	DLM_RS20960	1	DLM_RS18670	0		0
Chromobacterium violaceum ATCC 12472	NC_005085	4.751	64.8	4245	2	CV_RS06130/CV_RS15855	0		1	CV_RS18025	1	CV_RS09795	0		0		0		0		0		0		1	CV_RS10730	2	CV_RS03900/CV_RS17240	0		1	CV_RS21105	1	CV_RS06905	0		1	CV_RS06135	0		1	CV_RS13290	1	CV_RS21660	2	CV_RS02980/CV_RS09805	0		2
Laribacter hongkongensis HLHK9	NC_012559	3.169	62.4	2835	1	LHK_RS13920	0		2	LHK_RS03015/LHK_RS03390	0		0		0		0		0		0		0		1	LHK_RS10090	0		0		1	LHK_RS14600	0		0		1	LHK_RS13915	0		0		1	LHK_RS04755	1	LHK_RS00835	0		0
Pseudogulbenkiania sp. NH8B	NC_016002	4.333	64.4	3916	2	NH8B_RS01175/NH8B_RS05265	0		1	NH8B_RS03700	0		0		0		1	NH8B_RS15520	0		0		0		1	NH8B_RS09285	2	NH8B_RS14295/NH8B_RS18090	0		1	NH8B_RS01440	0		0		1	NH8B_RS03715	0		1	NH8B_RS13790	1	NH8B_RS00705	1	NH8B_RS18630	0		0
Crenobacter sp. K1W11S-77	NZ_CP031337	3.271	65.3	2980	1	DWG20_RS15500	4	DWG20_RS00760/DWG20_RS12580/DWG20_RS12595/DWG20_RS14970	2	DWG20_RS00730/DWG20_RS01855	0		0		0		1	DWG20_RS04115	2	DWG20_RS04710/DWG20_RS12350	0		0		1	DWG20_RS12505	1	DWG20_RS00735	1	DWG20_RS14975	1	DWG20_RS03840	0		0		1	DWG20_RS01840	0		0		1	DWG20_RS04600	1	DWG20_RS06755	0		0
Eikenella corrodens strain NCTC10596	NZ_LT906482	2.192	55.7	2063	1	CKV94_RS02165	0		0		0		0		0		0		0		1	CKV94_RS02060	0		1	CKV94_RS10085	1	CKV94_RS00600	0		1	CKV94_RS09355	0		1	CKV94_RS01040	1	CKV94_RS02160	0		1	CKV94_RS05780	1	CKV94_RS01560	1	CKV94_RS01815	0		0
Kingella kingae strain NCTC10529	NZ_LS483426	2.006	46.6	1948	1	DQN52_RS04510	0		0		1	DQN52_RS07995	0		0		0		0		2	DQN52_RS03135/DQN52_RS10075	0		1	DQN52_RS09955	1	DQN52_RS05580	0		0		0		1	DQN52_RS04400	1	DQN52_RS04525	0		2	DQN52_RS06740/DQN52_RS06935	1	DQN52_RS05955	1	DQN52_RS09670	0		0
Neisseria animalis NCTC10212	NZ_LR134287	2.241	51.9	1947	1	EL111_RS07040	0		0		0		0		0		0		0		1	EL111_RS02495	0		1	EL111_RS06585	0		0		1	EL111_RS05885	0		0		1	EL111_RS07030	0		1	EL111_RS09025	1	EL111_RS03505	1	EL111_RS02200	0		0
Neisseria animaloris NCTC12228	NZ_LR134440	2.338	49.3	2084	1	EL216_RS03385	0		0		1	EL216_RS05340	0		0		0		0		1	EL216_RS03790	0		1	EL216_RS02235	1	EL216_RS05000	0		1	EL216_RS02460	0		0		1	EL216_RS03380	0		1	EL216_RS03915	1	EL216_RS02840	1	EL216_RS04490	1	EL216_RS05955	0
Neisseria canis NCTC10296	NZ_LR134313	2.569	49.7	2275	1	EL143_RS11510	0		0		0		0		0		0		0		1	EL143_RS06855	0		1	EL143_RS11950	1	EL143_RS11860	0		1	EL143_RS07900	0		0		1	EL143_RS11500	0		1	EL143_RS10660	1	EL143_RS07540	1	EL143_RS09160	1	EL143_RS02045	0
Neisseria gonorrhoeae FA 1090	NC_002946	2.153	52.7	1886	1	NGO0579	0		0		1	NGO1276	0		0		0		0		1	NGO0994	0		1	NGO0281	1	NGO2050	0		0		0		0		1	NGO0537	0		1	NGO1516	1	NGO1215	1	NGO1237	0		0
Neisseria lactamica 020-06	NC_014752	2.22	52.3	2085	1	NLA_RS06015	0		0		0		0		0		0		0		1	NLA_RS03950	0		1	NLA_RS07940	1	NLA_RS00050	0		0		0		0		1	NLA_RS05730	0		2	NLA_RS02565/NLA_RS08720	1	NLA_RS03865	1	NLA_RS03755	0		0
Neisseria meningitidis MC58	NC_003112	2.272	51.5	1943	1	NMB1325	0		0		1	NMB1623	0		0		0		0		1	NMB1533	0		1	NMB0706	1	NMB0035	0		0		0		0		1	NMB1271	0		2	NMB0439/NMB0552	1	NMB1557	1	NMB1578	1	NMB1398	0
Neisseria mucosa ATCC19696	NZ_CP028150	2.688	51.1	2388	1	NM96_RS03860	0		0		1	NM96_RS02370	0		0		0		0		2	NM96_RS07165/NM96_RS12740	0		1	NM96_RS03820	1	NM96_RS11565	0		1	NM96_RS08745	0		1	NM96_RS05930	2	NM96_RS03455/NM96_RS03865	0		2	NM96_RS03810/NM96_RS08600	1	NM96_RS01840	1	NM96_RS01630	1	NM96_RS06990	0
Neisseria sicca FDAARGOS_260	NZ_CP020452	2.783	50.9	2445	1	A6J88_RS23460	0		0		1	A6J88_RS21860	0		0		0		0		2	A6J88_RS18610/A6J88_RS27050	0		1	A6J88_RS23415	1	A6J88_RS17370	0		1	A6J88_RS14585	0		1	A6J88_RS25845	2	A6J88_RS23045/A6J88_RS23465	0		2	A6J88_RS14430/A6J88_RS23405	1	A6J88_RS21285	1	A6J88_RS21125	1	A6J88_RS26875	0
Neisseria subflava M18660	NZ_CP031251	2.321	49	2098	1	DV114_RS03340	0		0		1	DV114_RS01865	0		0		0		0		2	DV114_RS07530/DV114_RS10550	0		1	DV114_RS05205	1	DV114_RS09880	0		0		0		1	DV114_RS04715	2	DV114_RS03325/DV114_RS03335	0		2	DV114_RS00835/DV114_RS01690	1	DV114_RS02130	1	DV114_RS07780	0		0
Neisseria weaveri NCTC13585	NZ_LT571436	2.188	49	1970	1	A8Q77_RS03255	0		0		1	A8Q77_RS06045	0		0		0		0		2	A8Q77_RS01350/A8Q77_RS04505	0		1	A8Q77_RS01165	1	A8Q77_RS09200	0		1	A8Q77_RS02900	0		0		1	A8Q77_RS03265	0		1	A8Q77_RS02450	1	A8Q77_RS02270	1	A8Q77_RS05540	0		0
Simonsiella muelleri ATCC 29453	NZ_CP019448	2.469	41.5	2286	1	BWP33_RS11750	0		0		1	BWP33_RS05340	0		0		0		0		1	BWP33_RS01920	0		1	BWP33_RS09690	1	BWP33_RS00635	0		0		0		0		1	BWP33_RS11745	0		1	BWP33_RS04650	1	BWP33_RS03985	1	BWP33_RS02825	0		0
Snodgrassella alvi wkB2	NZ_CP007446	2.527	41.3	2217	1	SALWKB2_RS07785	0		1	SALWKB2_RS07520	0		0		0		0		0		0		0		1	SALWKB2_RS02165	1	SALWKB2_RS10265	0		0		0		0		1	SALWKB2_RS07790	0		0		1	SALWKB2_RS05655	1	SALWKB2_RS00165	0		0
Vitreoscilla filiformis strain ATCC 15551	NZ_CP022423/NZ_CP022424/NZ_CP022425	3.787	63.49	3418	1	VITFI_RS01780	1	VITFI_RS05025	1	VITFI_RS16790	0		0		0		0		0		0		0		1	VITFI_RS10150	0		0		0		0		0		1	VITFI_RS01775	0		1	VITFI_RS12850	2	VITFI_RS04260/VITFI_RS04270	1	VITFI_RS01710	1	VITFI_RS04335	0
Ferriphaselus amnicola OYT1	NZ_AP018738	2.717	55.9	2607	2	OYT1_RS04575/OYT1_RS06685	4	OYT1_RS01490/OYT1_RS03015/OYT1_RS06730/OYT1_RS12470	0		0		0		0		1	OYT1_RS05715	0		0		0		1	OYT1_RS06920	0		2	OYT1_RS06710/OYT1_RS06735	1	OYT1_RS00705	0		1	OYT1_RS13360	0		0		0		1	OYT1_RS13385	1	OYT1_RS00180	0		0
Gallionella capsiferriformans ES-2	NC_014394	3.162	52.8	2864	3	GALF_RS03585/GALF_RS08715/GALF_RS13580	8	GALF_RS03545/GALF_RS04305/GALF_RS04640/GALF_RS05805/GALF_RS06795/GALF_RS08485/GALF_RS10885/GALF_RS13540	0		0		0		0		0		0		0		0		1	GALF_RS10510	3	GALF_RS04330/GALF_RS10860/GALF_RS11730	3	GALF_RS03540/GALF_RS06800/GALF_RS13535	1	GALF_RS14350	0		1	GALF_RS13210	1	GALF_RS09485	0		1	GALF_RS03875	1	GALF_RS10350	2	GALF_RS01300/GALF_RS12355	0		0
Sideroxydans lithotrophicus ES-1	NC_013959	3.003	57.5	2929	2	SLIT_RS07320/SLIT_RS09350	2	SLIT_RS09335/SLIT_RS09850	2	SLIT_RS09090/SLIT_RS09095	0		0		0		1	SLIT_RS08180	0		0		0		1	SLIT_RS10180	1	SLIT_RS12640	2	SLIT_RS09330/SLIT_RS09340	1	SLIT_RS14230	0		1	SLIT_RS00855	0		0		2	SLIT_RS01505/SLIT_RS05665	2	SLIT_RS03645/SLIT_RS03650	2	SLIT_RS09070/SLIT_RS12905	0		0
Sulfuricella denitrificans skB26	NC_022357/NC_022358	3.217	56.12	3016	2	SCD_RS09055/SCD_RS11075	2	SCD_RS09475/SCD_RS11395	1	SCD_RS11130	0		1	SCD_RS11125	0		1	SCD_RS08020	0		1	SCD_RS01830	0		1	SCD_RS09120	2	SCD_RS01505/SCD_RS01725	1	SCD_RS09165	1	SCD_RS13805	0		0		1	SCD_RS09090	0		1	SCD_RS02170	1	SCD_RS09500	4	SCD_RS06765/SCD_RS09495/SCD_RS13110/SCD_RS13130	0		0
Sulfuriferula sp. AH1	NZ_CP021138/NZ_CP021139	2.916	54.97	2818	0		4	CAP31_RS00395/CAP31_RS00675/CAP31_RS07160/CAP31_RS09870	1	CAP31_RS05030	0		1	CAP31_RS05025	0		1	CAP31_RS04630	0		0		0		1	CAP31_RS08430	0		2	CAP31_RS07155/CAP31_RS07165	0		0		0		3	CAP31_RS04265/CAP31_RS07885/CAP31_RS14500	0		0		1	CAP31_RS00840	1	CAP31_RS13470	0		0
Candidatus Methylopumilus planktonicus	NZ_LN827929	1.356	37	1373	0		2	BN1208_RS04215/BN1208_RS06885	0		0		0		0		0		0		1	BN1208_RS02820	0		1	BN1208_RS04450	0		0		0		0		0		1	BN1208_RS02645	0		0		1	BN1208_RS01595	1	BN1208_RS05545	0		0
Methylobacillus flagellatus KT	NC_007947	2.971	55.7	2715	2	MFLA_RS04805/MFLA_RS05535	5	MFLA_RS02575/MFLA_RS06680/MFLA_RS08365/MFLA_RS13005/MFLA_RS13080	2	MFLA_RS04795/MFLA_RS05525	0		0		1	MFLA_RS07315	1	MFLA_RS07320	0		2	MFLA_RS01085/MFLA_RS02850	0		1	MFLA_RS08255	0		0		1	MFLA_RS00140	0		0		2	MFLA_RS04800/MFLA_RS05530	0		0		1	MFLA_RS11205	1	MFLA_RS03210	0		0
Methylophilus sp. TWE2	NZ_CP012020	3.079	49.5	2859	1	ACJ67_RS13975	6	ACJ67_RS00810/ACJ67_RS02165/ACJ67_RS03300/ACJ67_RS07455/ACJ67_RS11910/ACJ67_RS13905	1	ACJ67_RS13950	0		0		0		0		0		1	ACJ67_RS12225	0		1	ACJ67_RS07020	0		0		1	ACJ67_RS14125	0		0		1	ACJ67_RS13970	0		1	ACJ67_RS12395	1	ACJ67_RS04995	1	ACJ67_RS11840	0		0
Methylotenera mobilis JLW8	NC_012968	2.547	45.5	2326	2	MMOL_RS06145/MMOL_RS07560	5	MMOL_RS06765/MMOL_RS07500/MMOL_RS07520/MMOL_RS08930/MMOL_RS11295	0		1	MMOL_RS05385	0		0		0		0		0		0		1	MMOL_RS04475	0		2	MMOL_RS07525/MMOL_RS07555	1	MMOL_RS00785	0		1	MMOL_RS06050	2	MMOL_RS07550/MMOL_RS09390	0		1	MMOL_RS00650	1	MMOL_RS02610	2	MMOL_RS05375/MMOL_RS09515	0		0
Methylovorus glucosetrophus SIP3-4	NC_012969/NC_012970/NC_012972	3.082	54.64	2884	1	MSIP34_RS06890	5	MSIP34_RS06030/MSIP34_RS07575/MSIP34_RS11085/MSIP34_RS11280/MSIP34_RS11290	1	MSIP34_RS02050	0		0		1	MSIP34_RS12840	0		0		1	MSIP34_RS01185	0		1	MSIP34_RS08650	0		1	MSIP34_RS02055	1	MSIP34_RS00140	0		0		1	MSIP34_RS04190	0		0		1	MSIP34_RS02575	1	MSIP34_RS06145	1	MSIP34_RS05095	0
Nitrosomonas europaea ATCC 19718	NC_004757	2.812	50.7	2544	2	ALW85_RS05315/ALW85_RS06320	4	ALW85_RS01820/ALW85_RS01980/ALW85_RS03500/ALW85_RS08550	5	ALW85_RS01475/ALW85_RS02975/ALW85_RS04085/ALW85_RS04855/ALW85_RS08060	1	ALW85_RS04840	1	ALW85_RS01480	1	ALW85_RS10730	1	ALW85_RS10725	0		0		0		1	ALW85_RS08630	2	ALW85_RS00755/ALW85_RS07795	0		1	ALW85_RS12445	0		0		2	ALW85_RS04405/ALW85_RS05320	2	ALW85_RS04935/ALW85_RS10745	3	ALW85_RS06200/ALW85_RS08830/ALW85_RS08970	0		2	ALW85_RS02695/ALW85_RS03565	0		1
Nitrosospira multiformis ATCC 25196	NC_007614/NC_007615/NC_007616/NC_007617	3.234	53.84	2817	2	NMUL_RS10495/NMUL_RS11885	4	NMUL_RS05855/NMUL_RS07400/NMUL_RS08605/NMUL_RS11005	1	NMUL_RS12480	1	NMUL_RS10450	0		2	NMUL_RS12100/NMUL_RS14380	2	NMUL_RS12095/NMUL_RS14375	0		1	NMUL_RS10450	0		1	NMUL_RS10350	2	NMUL_RS03035/NMUL_RS08390	1	NMUL_RS07405	1	NMUL_RS13985	0		0		1	NMUL_RS11890	3	NMUL_RS04230/NMUL_RS12115/NMUL_RS14395	0		0		4	NMUL_RS01000/NMUL_RS02375/NMUL_RS11660/NMUL_RS13885	0		3
Sulfuritalea hydrogenivorans sk43H	NZ_AP012547	3.802	63.3	3537	3	SUTH_RS02980/SUTH_RS04265/SUTH_RS12695	3	SUTH_RS03010/SUTH_RS03050/SUTH_RS17085	0		0		0		0		0		0		0		0		1	SUTH_RS13180	3	SUTH_RS04305/SUTH_RS12815/SUTH_RS12865	2	SUTH_RS03040/SUTH_RS03050	1	SUTH_RS17215	0		0		1	SUTH_RS04270	0		2	SUTH_RS01555/SUTH_RS04235	1	SUTH_RS02240	7	SUTH_RS05755/SUTH_RS12575/SUTH_RS12615/SUTH_RS12740/SUTH_RS16540/SUTH_RS16550/SUTH_RS16565	1	SUTH_RS00995	0
Thiobacillus denitrificans ATCC 25259	NC_007404	2.909	66.1	2771	2	TBD_RS11375/TBD_RS13740	5	TBD_RS00720/TBD_RS04570/TBD_RS06640/TBD_RS06665/TBD_RS08745	1	TBD_RS06625	0		1	TBD_RS06630	0		1	TBD_RS04060	0		0		0		1	TBD_RS04115	1	TBD_RS06930	3	TBD_RS06660/TBD_RS06670/TBD_RS14240	1	TBD_RS12850	0		1	TBD_RS12190	2	TBD_RS06700/TBD_RS08295	0		1	TBD_RS07030	1	TBD_RS13465	1	TBD_RS01680	2	TBD_RS03335/TBD_RS04590	0
Dechloromonas aromatica RCB	NC_007298	4.501	59.2	4192	3	DARO_RS05465/DARO_RS09470/DARO_RS11685	9	DARO_RS01565/DARO_RS06135/DARO_RS09675/DARO_RS11610/DARO_RS11675/DARO_RS12750/DARO_RS13405/DARO_RS13445/DARO_RS14355	0		0		0		0		0		1	DARO_RS11770	1	DARO_RS16730	0		1	DARO_RS08270	3	DARO_RS05770/DARO_RS08100/DARO_RS08120	4	DARO_RS11660/DARO_RS11670/DARO_RS12735/DARO_RS12745	1	DARO_RS21215	0		0		1	DARO_RS05475	0		1	DARO_RS14725	1	DARO_RS08135	4	DARO_RS00735/DARO_RS07615/DARO_RS08130/DARO_RS09515	1	DARO_RS15075	0
Azoarcus aromaticum EbN1	NC_006513/NC_006823/NC_006824	4.727	64.67	4359	2	EB_RS06030/EB_RS14400	1	EB_RS06020	0		0		0		0		1	EB_RS16805	1	EB_RS06050	1	EB_RS05180	0		1	EB_RS13090	2	EB_RS05145/EB_RS17550	2	EB_RS06000/EB_RS06015	1	EB_RS09880	0		0		1	EB_RS14405	0		4	EB_RS05785/EB_RS05870/EB_RS12840/EB_RS14370	1	EB_RS17185	3	EB_RS08030/EB_RS10125/EB_RS11770	0		0
Dechlorosoma suillum PS	NC_016616	3.806	65.4	3425	3	DSUI_RS05145/DSUI_RS05195/DSUI_RS08050	7	DSUI_RS04335/DSUI_RS05185/DSUI_RS05460/DSUI_RS12885/DSUI_RS14345/DSUI_RS16810/DSUI_RS17260	1	DSUI_RS12915	0		0		0		0		2	DSUI_RS05215/DSUI_RS12840	0		0		1	DSUI_RS12335	3	DSUI_RS04265/DSUI_RS08080/DSUI_RS16210	4	DSUI_RS05170/DSUI_RS05180/DSUI_RS12890/DSUI_RS12900	1	DSUI_RS03500	0		0		3	DSUI_RS05150/DSUI_RS08055/DSUI_RS12160	0		2	DSUI_RS08015/DSUI_RS10750	1	DSUI_RS16225	5	DSUI_RS02975/DSUI_RS03300/DSUI_RS05410/DSUI_RS16220/DSUI_RS17700	0		0
Rugosibacter aromaticivorans Ca6	CP010554	2.934	55.1	2457	1	PG1C_07125	6	PG1C_03445/PG1C_09265/PG1C_09290/PG1C_09330/PG1C_10375/PG1C_13675	1	PG1C_10185	0		0		0		0		0		1	PG1C_10190	0		1	PG1C_07215	1	PG1C_00170	3	PG1C_09260/PG1C_10195/PG1C_13680	1	PG1C_01250	0		0		4	PG1C_00365/PG1C_00400/PG1C_08745/PG1C_13640	0		1	PG1C_09785	1	PG1C_03400	1	PG1C_01625	1	PG1C_12295	0
Azoarcus communis TSPY31	NZ_CP022187	4.572	63.2	4060	2	CEW83_RS02215/CEW83_RS05005	1	CEW83_RS09485	0		0		0		0		1	CEW83_RS04715	0		1	CEW83_RS09465	0		1	CEW83_RS00260	1	CEW83_RS11265	2	CEW83_RS09470/CEW83_RS09480	1	CEW83_RS16180	0		0		2	CEW83_RS02220/CEW83_RS07395	0		1	CEW83_RS03455	1	CEW83_RS06285	2	CEW83_RS06290/CEW83_RS12905	1	CEW83_RS01655	0
Thauera aromatica K172	NZ_CP028339/NZ_CP028340	3.711	67.2	3341	2	Tharo_RS11555/Tharo_RS12275	2	Tharo_RS09385/Tharo_RS12270	0		0		0		0		1	Tharo_RS03860	0		2	Tharo_RS08825/Tharo_RS12250	0		1	Tharo_RS05830	3	Tharo_RS02720/Tharo_RS07310/Tharo_RS12220	2	Tharo_RS12255/Tharo_RS12265	1	Tharo_RS16525	0		0		1	Tharo_RS11550	0		3	Tharo_RS08320/Tharo_RS08865/Tharo_RS12940	1	Tharo_RS13335	3	Tharo_RS03810/Tharo_RS11445/Tharo_RS15975	0		0
Candidatus Accumulibacter phosphatis UW-1	NC_013194/NC_013193/NC_013190/NC_013191	5.306	63.96	4565	3	CAP2UW1_RS10590/CAP2UW1_RS19730/CAP2UW1_RS22795	7	CAP2UW1_RS00785/CAP2UW1_RS00840/CAP2UW1_RS22595/CAP2UW1_RS22715/CAP2UW1_RS22830/CAP2UW1_RS23040/CAP2UW1_RS23090	0		0		0		0		2	CAP2UW1_RS02180/CAP2UW1_RS18080	3	CAP2UW1_RS22565/CAP2UW1_RS22655/CAP2UW1_RS22860	0		0		1	CAP2UW1_RS19465	1	CAP2UW1_RS16950	2	CAP2UW1_RS22600/CAP2UW1_RS22610	1	CAP2UW1_RS17740	0		0		2	CAP2UW1_RS07420/CAP2UW1_RS10585	0		1	CAP2UW1_RS14950	2	CAP2UW1_RS08940/CAP2UW1_RS16965	4	CAP2UW1_RS08905/CAP2UW1_RS08950/CAP2UW1_RS16960/CAP2UW1_RS18480	0		0
Candidatus Kinetoplastibacterium blastocrithidii	NC_019814	0.82	32.5	728	0		0		0		0		0		0		0		0		0		0		0		0		0		0		0		0		0		0		0		0		0		0		0
Candidatus Nasuia deltocephalinicola NAS-ALF	NC_021919	0.112	17.1	138	0		0		0		0		0		0		0		0		0		0		0		0		0		0		0		0		0		0		0		0		0		0		0
Candidatus Profftella armatura DC	NC_021885/NC_021886	0.464	24.2	358	0		0		0		0		0		0		0		0		0		0		0		0		0		0		0		0		0		0		0		0		0		0		0
Candidatus Tremblaya princeps PCVAL	NC_017293	0.138	58.8	180	0		0		0		0		0		0		0		0		0		0		0		0		0		0		0		0		0		0		0		0		0		0		0
Candidatus Vidania fulgoroideae OLIH	CP028360	0.136	18.2	154	0		0		0		0		0		0		0		0		0		0		0		0		0		0		0		0		0		0		0		0		0		0		0
				447542	175		202		115		32		33		52		97		16		104		3		111		128		148		83		13		11		161		5		103		139		225		66		11
[truncated: 14 more columns]
